# Supplementary material for: Pincho: A Modular Approach to High Quality De Novo Transcriptomics
Source: Genes (Basel). 2021 Jun 22;12(7):953. doi: 10.3390/genes12070953 (PMC8304035; doi:10.3390/genes12070953)
Supplement: Supplementary file 1 [file genes-12-00953-s001.zip › Pincho_Figure_Data_v2.xlsx]

## Sheet: Species
Sirensis	transabyss	trinity	rnaspades	megahit	idba_tran	shannon	binpacker	tadpole	translig	transabyss_trinity	transabyss_rnaspades	transabyss_megahit	transabyss_idba_tran	transabyss_shannon	transabyss_binpacker	transabyss_tadpole	transabyss_translig	trinity_rnaspades	trinity_megahit	trinity_idba_tran	trinity_shannon	trinity_binpacker	trinity_tadpole	trinity_translig	rnaspades_megahit	rnaspades_idba_tran	rnaspades_shannon	rnaspades_binpacker	rnaspades_tadpole	rnaspades_translig	megahit_idba_tran	megahit_shannon	megahit_binpacker	megahit_tadpole	megahit_translig	idba_tran_shannon	idba_tran_binpacker	idba_tran_tadpole	idba_tran_translig	shannon_binpacker	shannon_tadpole	shannon_translig	binpacker_tadpole	binpacker_translig	tadpole_translig	transabyss_trinity_rnaspades	transabyss_trinity_megahit	transabyss_trinity_idba_tran	transabyss_trinity_shannon
mean_orf_percent	58.7706	59.2642	59.6949	58.6644	57.8626	55.4603	52.4174	71.8256	52.0081	58.9974	59.1904	58.7296	58.0348	56.8161	55.6405	67.0099	55.7212	59.4772	59.0088	58.0951	56.8709	55.6125	67.6572	55.698	59.2508	58.1612	57.0098	55.7752	67.8568	55.8764	57.9656	56.4346	54.8753	68.2837	54.8976	57.2565	56.8541	61.8552	56.9187	54.2355	64.342	54.2074	64.798	52.2299	65.3983	59.2137	58.9128	58.2055	57.4481
n90	295	267	276	370	418	283	441	230	549	280	285	331	391	288	339	239	354	271	313	383	276	316	236	326	315	384	280	319	238	329	409	316	395	239	428	381	420	306	430	319	240	328	241	497	241	279	306	368	281
n70	617	466	468	613	773	585	908	333	1031	542	545	615	742	599	741	388	779	467	527	715	532	657	359	691	530	717	534	663	359	698	749	595	763	376	813	730	793	562	809	707	390	738	412	962	412	518	560	698	558
n50	1231	873	891	1042	1310	1152	1568	606	1712	1059	1070	1150	1296	1183	1395	793	1445	882	949	1244	1040	1226	677	1272	960	1248	1049	1241	679	1289	1277	1115	1343	706	1404	1276	1354	1103	1371	1321	805	1359	880	1636	886	1005	1053	1242	1099
n30	2361	1629	1664	1776	2057	2012	2422	6282	2645	2001	2012	2092	2098	2135	2401	2726	2511	1648	1699	2000	1877	2088	2044	2153	1716	2002	1890	2099	2062	2164	2022	1935	2175	2223	2270	2046	2123	2119	2145	2186	2218	2250	2693	2520	2942	1892	1930	2042	2005
n10	10743	3130	3233	3223	3561	3688	4169	6282	4500	6246	6247	8545	3944	5128	6408	10743	7514	3178	3173	3516	3516	3760	12656	3892	3230	3523	3545	3779	12656	3903	3530	3567	3839	12636	3964	3594	3669	12633	3711	3890	12668	3993	12654	4355	25676	4496	4655	3846	4432
Complete_BUSCOs_(C)	179	160	190	186	192	185	183	110	185	183	194	192	192	188	189	179	187	193	189	192	185	185	163	187	195	195	194	195	191	197	192	190	193	186	193	193	193	192	193	189	184	189	183	189	185	194	192	192	188
Complete_and_single-copy_BUSCOs_(S)	123	121	163	168	2	105	128	38	129	37	36	34	2	14	22	72	22	53	46	1	28	30	59	33	27	5	19	30	104	30	1	18	26	97	22	3	1	4	2	11	58	13	75	13	78	22	23	1	13
Complete_and_duplicated_BUSCOs_(D)	56	39	27	18	190	80	55	72	56	146	158	158	190	174	167	107	165	140	143	191	157	155	104	154	168	190	175	165	87	167	191	172	167	89	171	190	192	188	191	178	126	176	108	176	107	172	169	191	175
Fragmented_BUSCOs_(F)	48	59	42	41	38	48	45	97	32	47	40	40	41	45	44	50	44	41	45	42	48	47	60	41	39	39	40	40	41	37	38	44	39	45	37	42	39	40	39	45	49	45	46	40	40	39	41	42	45
Missing_BUSCOs_(M)	28	36	23	28	25	22	27	48	38	25	21	23	22	22	22	26	24	21	21	21	22	23	32	27	21	21	21	20	23	21	25	21	23	24	25	20	23	23	23	21	22	21	26	26	30	22	22	21	22
Total_BUSCO_groups_searched	255	255	255	255	255	255	255	255	255	255	255	255	255	255	255	255	255	255	255	255	255	255	255	255	255	255	255	255	255	255	255	255	255	255	255	255	255	255	255	255	255	255	255	255	255	255	255	255	255
reads	4913405	4913405	4913405	4913405	4913405	4913405	4913405	4913405	4913405	4913405	4913405	4913405	4913405	4913405	4913405	4913405	4913405	4913405	4913405	4913405	4913405	4913405	4913405	4913405	4913405	4913405	4913405	4913405	4913405	4913405	4913405	4913405	4913405	4913405	4913405	4913405	4913405	4913405	4913405	4913405	4913405	4913405	4913405	4913405	4913405	4913405	4913405	4913405	4913405
were_paired	4913405	4913405	4913405	4913405	4913405	4913405	4913405	4913405	4913405	4913405	4913405	4913405	4913405	4913405	4913405	4913405	4913405	4913405	4913405	4913405	4913405	4913405	4913405	4913405	4913405	4913405	4913405	4913405	4913405	4913405	4913405	4913405	4913405	4913405	4913405	4913405	4913405	4913405	4913405	4913405	4913405	4913405	4913405	4913405	4913405	4913405	4913405	4913405	4913405
aligned_concordantly_0_times	375023	547027	394085	604655	778600	577981	738930	961015	693983	298287	258007	327208	518266	335414	340055	413759	332380	304755	396917	751130	389556	468875	471421	416044	328811	479211	330843	335489	382577	317702	599750	408257	484967	497441	469438	520319	730713	641877	741321	514800	469426	455865	523151	646477	514226	238021	274969	566803	357765
aligned_concordantly_exactly_1_time	2283626	2476904	4014168	4307297	273720	1520926	1858141	784482	1823259	870207	777994	798372	653880	785889	809099	830578	771139	1023471	1041293	461214	665815	728986	873979	724075	984269	682510	824531	927024	1122462	910582	553503	788487	807175	1089438	777662	501059	404857	553002	420288	423342	739022	504138	750681	339382	735278	632435	687427	646026	615168
aligned_concordantly_>1_times	2254756	1889474	505152	1453	3861085	2814498	2316334	3167908	2396163	3744911	3877404	3787825	3741259	3792102	3764251	3669068	3809886	3585179	3475195	3701061	3858034	3715544	3568005	3773286	3600325	3751684	3758031	3650892	3408366	3685121	3760152	3716661	3621263	3326526	3666305	3892027	3777835	3718526	3751796	3975263	3704957	3953402	3639573	3927546	3663901	4042949	3951009	3700576	3940472
pairs_aligned_concordantly_0_times	375023	547027	394085	604655	778600	577981	738930	961015	693983	298287	258007	327208	518266	335414	340055	413759	332380	304755	396917	751130	389556	468875	471421	416044	328811	479211	330843	335489	382577	317702	599750	408257	484967	497441	469438	520319	730713	641877	741321	514800	469426	455865	523151	646477	514226	238021	274969	566803	357765
aligned_discordantly_1_time	16468	11410	17509	23682	3225	7136	5926	17299	4643	9484	6580	8091	5650	9340	9178	6305	9138	8176	9154	3180	5193	5718	7068	6341	8562	5629	6507	8027	7025	6980	6319	8205	7120	9190	6895	4059	2911	6046	2948	3548	8172	4747	7755	2514	6930	5887	6805	5148	7189
pairs_aligned_0_times_concordantly_or_discordantly	358555	535617	376576	580973	775375	570845	733004	943716	689340	288803	251427	319117	512616	326074	330877	407454	323242	296579	387763	747950	384363	463157	464353	409703	320249	473582	324336	327462	375552	310722	593431	400052	477847	488251	462543	516260	727802	635831	738373	511252	461254	451118	515396	643963	507296	232134	268164	561655	350576
mates_make_up_the_pairs	717110	1071234	753152	1161946	1550750	1141690	1466008	1887432	1378680	577606	502854	638234	1025232	652148	661754	814908	646484	593158	775526	1495900	768726	926314	928706	819406	640498	947164	648672	654924	751104	621444	1186862	800104	955694	976502	925086	1032520	1455604	1271662	1476746	1022504	922508	902236	1030792	1287926	1014592	464268	536328	1123310	701152
aligned_0_times	472783	843696	578748	970004	1375136	898357	1250010	944844	1187221	369708	315918	408924	819995	453755	441478	437091	421103	434414	590001	1333790	568166	736101	505948	639952	481187	785973	476952	495495	406549	466230	1022641	606055	771282	547771	746762	857221	1296175	903578	1322022	795112	514633	687210	603492	1085362	588453	288102	340760	929544	511498
aligned_exactly_1_time	181473	132920	149975	191031	63104	108690	106466	378973	93070	109144	88880	122641	102921	95485	126087	153019	131329	71037	89539	53954	69721	70254	164604	69795	74118	66765	66448	73352	150679	71418	62635	81319	83128	193153	79237	58977	49946	146266	45280	66331	160100	70740	170514	60112	162541	77184	94006	90306	82311
aligned_>1_times	62854	94618	24429	911	112510	134643	109532	563615	98389	98754	98056	106669	102316	102908	94189	224798	94052	87707	95986	108156	130839	119959	258154	109659	85193	94426	105272	86077	193876	83796	101586	112730	101284	235578	99087	116322	109483	221818	109444	161061	247775	144286	256786	142452	263598	98982	101562	103460	107343
overall_alignment_rate	0.9519	0.9141	0.9411	0.9013	0.8601	0.9086	0.8728	0.9039	0.8792	0.9624	0.9679	0.9584	0.9166	0.9538	0.9551	0.9555	0.9571	0.9558	0.94	0.8643	0.9422	0.9251	0.9485	0.9349	0.951	0.92	0.9515	0.9496	0.9586	0.9526	0.8959	0.9383	0.9215	0.9443	0.924	0.9128	0.8681	0.908	0.8655	0.9191	0.9476	0.9301	0.9386	0.8896	0.9401	0.9707	0.9653	0.9054	0.9479
Assembly	transabyss	trinity	rnaspades	megahit	idba_tran	shannon	binpacker	tadpole	translig	transabyss_trinity	transabyss_rnaspades	transabyss_megahit	transabyss_idba_tran	transabyss_shannon	transabyss_binpacker	transabyss_tadpole	transabyss_translig	trinity_rnaspades	trinity_megahit	trinity_idba_tran	trinity_shannon	trinity_binpacker	trinity_tadpole	trinity_translig	rnaspades_megahit	rnaspades_idba_tran	rnaspades_shannon	rnaspades_binpacker	rnaspades_tadpole	rnaspades_translig	megahit_idba_tran	megahit_shannon	megahit_binpacker	megahit_tadpole	megahit_translig	idba_tran_shannon	idba_tran_binpacker	idba_tran_tadpole	idba_tran_translig	shannon_binpacker	shannon_tadpole	shannon_translig	binpacker_tadpole	binpacker_translig	tadpole_translig	transabyss_trinity_rnaspades	transabyss_trinity_megahit	transabyss_trinity_idba_tran	transabyss_trinity_shannon
Busco_compared_to_Megahit	-0.0460526	-0.171053	0.181818	0	0.272727	-0.00657895	-0.0197368	-0.5	-0.00657895	-0.0197368	0.363636	0.272727	0.272727	0.0909091	0.136364	-0.0460526	0.0454545	0.318182	0.136364	0.272727	-0.00657895	-0.00657895	-0.151316	0.0454545	0.409091	0.409091	0.363636	0.409091	0.227273	0.5	0.272727	0.181818	0.318182	0	0.318182	0.318182	0.318182	0.272727	0.318182	0.136364	-0.0131579	0.136364	-0.0197368	0.136364	-0.00657895	0.363636	0.272727	0.272727	0.0909091
Hisat2_compared_to_Megahit	0.364553	0.092219	0.286744	0	-0.406312	0.0525937	-0.281065	0.018732	-0.217949	0.440202	0.479827	0.411383	0.110231	0.378242	0.387608	0.39049	0.402017	0.392651	0.278818	-0.364892	0.294669	0.17147	0.340058	0.242075	0.358069	0.134726	0.361671	0.347983	0.412824	0.369597	-0.0532544	0.266571	0.145533	0.309798	0.163545	0.082853	-0.327416	0.0482709	-0.353057	0.128242	0.333573	0.207493	0.268732	-0.115385	0.279539	0.5	0.461095	0.0295389	0.335735
n50_compared_to_Megahit	0.141045	-0.193807	-0.173165	0	0.2	0.0820896	0.392537	-0.5	0.5	0.0126866	0.0208955	0.080597	0.189552	0.105224	0.263433	-0.28555	0.300746	-0.183486	-0.106651	0.150746	-0.00229358	0.137313	-0.418578	0.171642	-0.0940367	0.153731	0.00522388	0.148507	-0.416284	0.184328	0.175373	0.0544776	0.224627	-0.385321	0.270149	0.174627	0.232836	0.0455224	0.245522	0.208209	-0.271789	0.236567	-0.18578	0.443284	-0.178899	-0.0424312	0.00820896	0.149254	0.0425373
n90_compared_to_Megahit	-0.267857	-0.367857	-0.335714	0	0.134078	-0.310714	0.198324	-0.5	0.5	-0.321429	-0.303571	-0.139286	0.0586592	-0.292857	-0.110714	-0.467857	-0.0571429	-0.353571	-0.203571	0.0363128	-0.335714	-0.192857	-0.478571	-0.157143	-0.196429	0.0391061	-0.321429	-0.182143	-0.471429	-0.146429	0.108939	-0.192857	0.0698324	-0.467857	0.162011	0.0307263	0.139665	-0.228571	0.167598	-0.182143	-0.464286	-0.15	-0.460714	0.354749	-0.460714	-0.325	-0.228571	-0.00714286	-0.317857
Average Assessment Score	0.0850315	-0.119889	0.071374	0	0.0111516	-0.0227659	-0.00179042	-0.327089	0.0918241	0.088698	0.234042	0.218255	0.169021	0.125112	0.20011	-0.0107555	0.189758	0.147435	0.0866902	0.000455104	0.0396952	0.0457063	-0.086611	0.0982596	0.207309	0.213412	0.189068	0.246752	0.0654135	0.296182	0.120543	0.1264	0.203648	-0.0389303	0.232602	0.167904	0.0590053	0.0764912	0.0572282	0.0925463	-0.0158739	0.129047	-0.0247506	0.139998	-0.0156156	0.22664	0.20788	0.124441	0.096328
Imitator	transabyss	trinity	rnaspades	megahit	idba_tran	shannon	binpacker	tadpole	translig	transabyss_trinity	transabyss_rnaspades	transabyss_megahit	transabyss_idba_tran	transabyss_shannon	transabyss_binpacker	transabyss_tadpole	transabyss_translig	trinity_rnaspades	trinity_megahit	trinity_idba_tran	trinity_shannon	trinity_binpacker	trinity_tadpole	trinity_translig	rnaspades_megahit	rnaspades_idba_tran	rnaspades_shannon	rnaspades_binpacker	rnaspades_tadpole	rnaspades_translig	megahit_idba_tran	megahit_shannon	megahit_binpacker	megahit_tadpole	megahit_translig	idba_tran_shannon	idba_tran_binpacker	idba_tran_tadpole	idba_tran_translig	shannon_binpacker	shannon_tadpole	shannon_translig	binpacker_tadpole	binpacker_translig	tadpole_translig	transabyss_trinity_rnaspades	transabyss_trinity_megahit	transabyss_trinity_idba_tran	transabyss_trinity_shannon
mean_orf_percent	59.2084	59.2651	52.6524	57.9255	58.4618	52.5796	54.9594	68.4985	54.9411	59.2314	56.4892	58.7443	58.6666	55.78	57.4464	63.66	57.7931	55.9001	58.6581	58.6269	55.1849	57.0745	64.5611	57.4471	54.9958	57.2338	52.6086	53.8057	61.6034	53.595	58.3671	54.4296	56.2778	64.4676	56.5325	56.7657	57.7216	61.0527	57.9054	53.5269	59.9347	53.3272	62.6085	54.9519	63.7483	57.2828	58.9025	58.7612	56.6452
n90	326	302	416	361	442	312	401	247	458	316	352	337	407	319	351	268	356	345	325	410	307	343	258	349	387	438	344	408	268	435	428	327	382	262	400	405	434	341	444	343	264	347	268	423	264	335	325	389	314
n70	721	623	1016	734	822	704	838	399	913	680	823	726	795	712	765	500	779	797	673	782	670	725	451	737	869	852	813	917	508	969	807	714	787	464	811	790	825	640	834	754	488	767	492	867	480	761	693	767	689
n50	1373	1155	1799	1271	1374	1287	1456	705	1562	1283	1531	1334	1373	1328	1405	999	1431	1460	1209	1331	1234	1313	851	1324	1539	1445	1477	1619	1064	1695	1356	1281	1374	871	1400	1352	1391	1176	1400	1357	962	1374	958	1496	923	1422	1280	1340	1285
n30	2462	1939	2815	2061	2124	2120	2363	4365	2414	2230	2631	2298	2201	2271	2415	2578	2441	2379	1990	2092	2044	2158	2134	2149	2467	2264	2402	2592	2970	2649	2113	2098	2223	2265	2226	2123	2170	2168	2169	2214	2228	2215	2515	2388	2610	2410	2182	2162	2185
n10	12089	3596	5296	3573	3688	3726	4168	4365	4362	6637	16526	7361	4249	5425	6734	12089	10659	4391	3582	3669	3676	3898	15564	3885	4474	3970	4341	4674	16526	4869	3669	3681	3913	16513	3906	3695	3790	15581	3779	3915	12667	3908	10885	4227	14314	5973	4901	4113	4629
Complete_BUSCOs_(C)	174	158	196	169	176	142	171	88	145	176	200	179	182	176	183	175	177	198	173	176	159	174	159	166	199	198	198	198	197	198	178	172	179	171	174	176	180	176	178	172	144	157	172	173	148	200	179	182	176
Complete_and_single-copy_BUSCOs_(S)	136	153	195	169	0	114	165	37	142	26	36	18	8	40	32	87	38	58	29	1	23	28	93	40	44	28	71	43	135	71	2	38	29	109	44	0	5	0	2	36	63	34	104	42	83	34	15	9	24
Complete_and_duplicated_BUSCOs_(D)	38	5	1	0	176	28	6	51	3	150	164	161	174	136	151	88	139	140	144	175	136	146	66	126	155	170	127	155	62	127	176	134	150	62	130	176	175	176	176	136	81	123	68	131	65	166	164	173	152
Fragmented_BUSCOs_(F)	45	50	32	42	39	56	39	96	33	47	30	43	43	46	43	47	46	31	45	42	52	43	54	46	31	33	31	31	32	31	38	45	40	44	41	40	40	42	37	43	62	48	45	42	50	30	43	43	47
Missing_BUSCOs_(M)	36	47	27	44	40	57	45	71	77	32	25	33	30	33	29	33	32	26	37	37	44	38	42	43	25	24	26	26	26	26	39	38	36	40	40	39	35	37	40	40	49	50	38	40	57	25	33	30	32
Total_BUSCO_groups_searched	255	255	255	255	255	255	255	255	255	255	255	255	255	255	255	255	255	255	255	255	255	255	255	255	255	255	255	255	255	255	255	255	255	255	255	255	255	255	255	255	255	255	255	255	255	255	255	255	255
reads	16066677	16066677	16066677	16066677	16066677	16066677	16066677	16066677	16066677	16066677	16066677	16066677	16066677	16066677	16066677	16066677	16066677	16066677	16066677	16066677	16066677	16066677	16066677	16066677	16066677	16066677	16066677	16066677	16066677	16066677	16066677	16066677	16066677	16066677	16066677	16066677	16066677	16066677	16066677	16066677	16066677	16066677	16066677	16066677	16066677	16066677	16066677	16066677	16066677
were_paired	16066677	16066677	16066677	16066677	16066677	16066677	16066677	16066677	16066677	16066677	16066677	16066677	16066677	16066677	16066677	16066677	16066677	16066677	16066677	16066677	16066677	16066677	16066677	16066677	16066677	16066677	16066677	16066677	16066677	16066677	16066677	16066677	16066677	16066677	16066677	16066677	16066677	16066677	16066677	16066677	16066677	16066677	16066677	16066677	16066677	16066677	16066677	16066677	16066677
aligned_concordantly_0_times	3072282	3771942	3088556	3621133	4571075	4733229	4161454	6346754	4170230	3203430	2733485	2938039	3038158	3971341	3048391	3097226	3012941	2936895	3281227	3420204	4434972	3536005	3668335	3517269	2925881	3004202	3661632	2961336	3083021	2908882	3456692	4033803	3680067	3597162	3294816	4336175	3447175	3956002	3423467	4282375	4759809	4451144	3961466	3683237	3921199	2739883	3187071	3235394	4134538
aligned_concordantly_exactly_1_time	4637567	7708838	10304551	12444672	657677	4209682	7389169	1423347	8077728	1037398	940350	906297	1012683	1032248	1354280	1927370	1599063	1142748	967379	538238	616940	902724	2201858	1508714	1080256	958561	1450076	1504492	3030934	1821989	1395879	1067896	1121588	3159295	1575282	516685	752779	503027	1057593	803949	1233883	900944	2198942	1275054	2220079	842143	900447	901495	796998
aligned_concordantly_>1_times	8356828	4585897	2673570	872	10837925	7123766	4516054	8296576	3818719	11825849	12392842	12222341	12015836	11063088	11664006	11042081	11454673	11987034	11818071	12108235	11014765	11627948	10196484	11040694	12060540	12103914	10954969	11600849	9952722	11335806	11214106	10964978	11265022	9310220	11196579	11213817	11866723	11607648	11585617	10980353	10072985	10714589	9906269	11108386	9925399	12484651	11979159	11929788	11135141
pairs_aligned_concordantly_0_times	3072282	3771942	3088556	3621133	4571075	4733229	4161454	6346754	4170230	3203430	2733485	2938039	3038158	3971341	3048391	3097226	3012941	2936895	3281227	3420204	4434972	3536005	3668335	3517269	2925881	3004202	3661632	2961336	3083021	2908882	3456692	4033803	3680067	3597162	3294816	4336175	3447175	3956002	3423467	4282375	4759809	4451144	3961466	3683237	3921199	2739883	3187071	3235394	4134538
aligned_discordantly_1_time	288875	212666	151355	289155	27234	152067	191185	110395	113634	120344	43655	125275	136681	145732	138786	125598	211030	36406	34117	20660	15620	22789	61934	62549	45183	41027	37528	45257	59225	50029	46614	28578	44100	98231	58494	11809	22252	44544	15637	13855	47999	46251	65693	44415	68346	38690	104784	102046	108658
pairs_aligned_0_times_concordantly_or_discordantly	2783407	3559276	2937201	3331978	4543841	4581162	3970269	6236359	4056596	3083086	2689830	2812764	2901477	3825609	2909605	2971628	2801911	2900489	3247110	3399544	4419352	3513216	3606401	3454720	2880698	2963175	3624104	2916079	3023796	2858853	3410078	4005225	3635967	3498931	3236322	4324366	3424923	3911458	3407830	4268520	4711810	4404893	3895773	3638822	3852853	2701193	3082287	3133348	4025880
mates_make_up_the_pairs	5566814	7118552	5874402	6663956	9087682	9162324	7940538	12472718	8113192	6166172	5379660	5625528	5802954	7651218	5819210	5943256	5603822	5800978	6494220	6799088	8838704	7026432	7212802	6909440	5761396	5926350	7248208	5832158	6047592	5717706	6820156	8010450	7271934	6997862	6472644	8648732	6849846	7822916	6815660	8537040	9423620	8809786	7791546	7277644	7705706	5402386	6164574	6266696	8051760
aligned_0_times	3733647	5446842	4276069	5484597	7182895	7283491	6395791	6925596	6643281	3996009	3558047	3648914	3851942	5586858	3821380	3702532	3711921	4146656	4852594	5177072	6979885	5255919	4918496	5217486	4087282	4247792	5631982	4166343	4157395	4098630	5309261	6427664	5724566	5018606	4972365	7028403	5320298	5413499	5266201	6776557	6928337	7040304	5407643	5631808	5368793	3597380	4069499	4190222	6039409
aligned_exactly_1_time	980992	955811	1154574	1163820	464878	784748	919798	1429111	825973	844587	562490	777526	780040	819070	809762	888757	829326	565899	470547	374555	345527	402527	713078	575329	631041	629395	601211	640103	780202	693802	490898	427595	513632	882855	549639	277565	354278	669686	259912	311706	657270	500247	763133	499078	761974	528382	806704	741433	729230
aligned_>1_times	852175	715899	443759	15539	1439909	1094085	624949	4118011	643938	1325576	1259123	1199088	1170972	1245290	1188068	1351967	1062575	1088423	1171079	1247461	1513292	1367986	1581228	1116625	1043073	1049163	1015015	1025712	1109995	925274	1019997	1155191	1033736	1096401	950640	1342764	1175270	1739731	1289547	1448777	1838013	1269235	1620770	1146758	1574939	1276624	1288371	1335041	1283121
overall_alignment_rate	0.8838	0.8305	0.8669	0.8293	0.7765	0.7733	0.801	0.7845	0.7933	0.8756	0.8893	0.8864	0.8801	0.8261	0.8811	0.8848	0.8845	0.871	0.849	0.8389	0.7828	0.8364	0.8469	0.8376	0.8728	0.8678	0.8247	0.8703	0.8706	0.8724	0.8348	0.8	0.8218	0.8438	0.8453	0.7813	0.8344	0.8315	0.8361	0.7891	0.7844	0.7809	0.8317	0.8247	0.8329	0.888	0.8734	0.8696	0.8121
Assembly	transabyss	trinity	rnaspades	megahit	idba_tran	shannon	binpacker	tadpole	translig	transabyss_trinity	transabyss_rnaspades	transabyss_megahit	transabyss_idba_tran	transabyss_shannon	transabyss_binpacker	transabyss_tadpole	transabyss_translig	trinity_rnaspades	trinity_megahit	trinity_idba_tran	trinity_shannon	trinity_binpacker	trinity_tadpole	trinity_translig	rnaspades_megahit	rnaspades_idba_tran	rnaspades_shannon	rnaspades_binpacker	rnaspades_tadpole	rnaspades_translig	megahit_idba_tran	megahit_shannon	megahit_binpacker	megahit_tadpole	megahit_translig	idba_tran_shannon	idba_tran_binpacker	idba_tran_tadpole	idba_tran_translig	shannon_binpacker	shannon_tadpole	shannon_translig	binpacker_tadpole	binpacker_translig	tadpole_translig	transabyss_trinity_rnaspades	transabyss_trinity_megahit	transabyss_trinity_idba_tran	transabyss_trinity_shannon
Busco_compared_to_Megahit	0.078125	-0.0679012	0.421875	0	0.109375	-0.166667	0.03125	-0.5	-0.148148	0.109375	0.484375	0.15625	0.203125	0.109375	0.21875	0.09375	0.125	0.453125	0.0625	0.109375	-0.0617284	0.078125	-0.0617284	-0.0185185	0.46875	0.453125	0.453125	0.453125	0.4375	0.453125	0.140625	0.046875	0.15625	0.03125	0.078125	0.109375	0.171875	0.109375	0.140625	0.046875	-0.154321	-0.0740741	0.046875	0.0625	-0.12963	0.484375	0.15625	0.203125	0.109375
Hisat2_compared_to_Megahit	0.445261	0.00980392	0.30719	0	-0.471429	-0.5	-0.252679	-0.4	-0.321429	0.378268	0.490196	0.466503	0.415033	-0.0285714	0.423203	0.453431	0.45098	0.340686	0.160948	0.0784314	-0.415179	0.0580065	0.143791	0.0678105	0.355392	0.314542	-0.0410714	0.334967	0.337418	0.352124	0.0449346	-0.261607	-0.0669643	0.118464	0.130719	-0.428571	0.0416667	0.0179739	0.0555556	-0.358929	-0.400893	-0.432143	0.0196078	-0.0410714	0.0294118	0.479575	0.360294	0.329248	-0.153571
n50_compared_to_Megahit	0.0965909	-0.102473	0.5	0	0.0975379	0.0151515	0.175189	-0.5	0.275568	0.0113636	0.246212	0.0596591	0.0965909	0.0539773	0.126894	-0.240283	0.151515	0.178977	-0.0547703	0.0568182	-0.0326855	0.0397727	-0.371025	0.0501894	0.253788	0.164773	0.195076	0.329545	-0.182862	0.401515	0.0804924	0.0094697	0.0975379	-0.353357	0.122159	0.0767045	0.113636	-0.0839223	0.122159	0.0814394	-0.272968	0.0975379	-0.276502	0.213068	-0.30742	0.142992	0.00852273	0.0653409	0.0132576
n90_compared_to_Megahit	-0.153509	-0.258772	0.283505	0	0.417526	-0.214912	0.206186	-0.5	0.5	-0.197368	-0.0394737	-0.105263	0.237113	-0.184211	-0.0438596	-0.407895	-0.0219298	-0.0701754	-0.157895	0.252577	-0.236842	-0.0789474	-0.451754	-0.0526316	0.134021	0.396907	-0.0745614	0.242268	-0.407895	0.381443	0.345361	-0.149123	0.108247	-0.434211	0.201031	0.226804	0.376289	-0.0877193	0.427835	-0.0789474	-0.425439	-0.0614035	-0.407895	0.319588	-0.425439	-0.114035	-0.157895	0.14433	-0.20614
Average Assessment Score	0.164976	-0.0795733	0.373606	0	-0.0348406	-0.255516	-0.010247	-0.466667	-0.0272642	0.131547	0.359313	0.199984	0.26167	0.00522898	0.227823	0.0743642	0.213591	0.282737	0.0390384	0.114168	-0.20389	0.0388481	-0.109776	0.0160236	0.339349	0.349502	0.157437	0.358	0.159847	0.398909	0.132829	-0.0948529	0.0640595	-0.0813566	0.12348	-0.055814	0.152835	0.0138427	0.157059	-0.103603	-0.301472	-0.162717	-0.0919051	0.0959188	-0.155549	0.326143	0.147286	0.212403	-0.0468793
Ruber	transabyss	trinity	rnaspades	megahit	idba_tran	shannon	binpacker	tadpole	translig	transabyss_trinity	transabyss_rnaspades	transabyss_megahit	transabyss_idba_tran	transabyss_shannon	transabyss_binpacker	transabyss_tadpole	transabyss_translig	trinity_rnaspades	trinity_megahit	trinity_idba_tran	trinity_shannon	trinity_binpacker	trinity_tadpole	trinity_translig	rnaspades_megahit	rnaspades_idba_tran	rnaspades_shannon	rnaspades_binpacker	rnaspades_tadpole	rnaspades_translig	megahit_idba_tran	megahit_shannon	megahit_binpacker	megahit_tadpole	megahit_translig	idba_tran_shannon	idba_tran_binpacker	idba_tran_tadpole	idba_tran_translig	shannon_binpacker	shannon_tadpole	shannon_translig	binpacker_tadpole	binpacker_translig	tadpole_translig	transabyss_trinity_rnaspades	transabyss_trinity_megahit	transabyss_trinity_idba_tran	transabyss_trinity_shannon
mean_orf_percent	57.2977	57.3645	58.5472	58.0889	57.6406	53.5632	52.8115	70.7702	51.5038	57.3278	57.8326	57.5913	57.5731	55.1741	55.0726	65.7755	54.6578	57.9292	57.6677	57.5945	55.0202	54.88	66.406	54.4028	58.3452	57.7812	55.3683	55.2896	67.0293	54.8292	57.6973	54.9623	54.7893	67.4997	54.2261	56.6447	56.702	61.4988	56.5958	53.2419	63.2483	52.7634	64.1795	52.2104	64.4073	57.6833	57.5141	57.5441	55.7461
n90	310	282	290	379	433	303	459	229	548	297	300	340	405	306	358	239	372	286	327	401	294	341	236	354	331	405	297	348	237	364	424	333	412	238	443	400	437	305	446	347	241	358	242	504	241	294	321	384	299
n70	650	534	542	639	809	638	929	332	1057	597	604	646	775	644	771	392	809	538	580	758	594	721	366	755	586	764	600	737	365	776	783	638	796	375	847	768	831	580	846	753	397	784	418	984	416	581	608	738	613
n50	1251	1003	1015	1096	1376	1202	1580	614	1762	1138	1148	1188	1351	1225	1415	818	1479	1010	1044	1318	1124	1313	717	1373	1053	1323	1132	1333	714	1397	1340	1165	1388	721	1466	1338	1414	1152	1435	1370	832	1422	916	1665	925	1103	1127	1307	1165
n30	2342	1810	1814	1860	2183	2097	2521	6474	2736	2096	2105	2144	2207	2195	2442	2529	2537	1811	1835	2130	1991	2221	2147	2310	1836	2134	1997	2228	2160	2317	2147	2020	2275	2238	2379	2164	2241	2229	2267	2281	2265	2355	2662	2616	2880	2004	2028	2161	2097
n10	12511	3505	3473	3459	3792	3854	4384	7411	4733	5081	5224	5470	4113	4781	5380	12511	5862	3492	3483	3756	3745	3986	12384	4188	3464	3754	3734	4008	11941	4214	3758	3750	4034	12271	4264	3808	3901	12799	3956	4050	14291	4214	12865	4538	35722	4415	4516	4003	4364
Complete_BUSCOs_(C)	184	172	185	188	195	192	189	121	189	189	194	194	198	196	194	185	194	193	193	197	193	193	174	192	193	198	196	196	189	196	196	197	196	190	196	198	199	195	199	195	193	195	192	194	191	196	199	199	196
Complete_and_single-copy_BUSCOs_(S)	142	162	177	188	5	127	123	38	131	29	33	23	9	22	20	64	23	47	38	6	30	33	68	29	26	7	26	26	90	27	4	20	23	90	24	8	8	5	7	10	67	11	59	12	58	21	18	5	13
Complete_and_duplicated_BUSCOs_(D)	42	10	8	0	190	65	66	83	58	160	161	171	189	174	174	121	171	146	155	191	163	160	106	163	167	191	170	170	99	169	192	177	173	100	172	190	191	190	192	185	126	184	133	182	133	175	181	194	183
Fragmented_BUSCOs_(F)	41	48	45	35	39	38	37	89	30	39	39	37	38	37	35	41	33	40	36	38	40	35	53	34	40	40	39	38	43	36	39	37	34	41	32	40	37	41	36	38	38	37	38	32	37	39	34	37	38
Missing_BUSCOs_(M)	30	35	25	32	21	25	29	45	36	27	22	24	19	22	26	29	28	22	26	20	22	27	28	29	22	17	20	21	23	23	20	21	25	24	27	17	19	19	20	22	24	23	25	29	27	20	22	19	21
Total_BUSCO_groups_searched	255	255	255	255	255	255	255	255	255	255	255	255	255	255	255	255	255	255	255	255	255	255	255	255	255	255	255	255	255	255	255	255	255	255	255	255	255	255	255	255	255	255	255	255	255	255	255	255	255
reads	5836066	5836066	5836066	5836066	5836066	5836066	5836066	5836066	5836066	5836066	5836066	5836066	5836066	5836066	5836066	5836066	5836066	5836066	5836066	5836066	5836066	5836066	5836066	5836066	5836066	5836066	5836066	5836066	5836066	5836066	5836066	5836066	5836066	5836066	5836066	5836066	5836066	5836066	5836066	5836066	5836066	5836066	5836066	5836066	5836066	5836066	5836066	5836066	5836066
were_paired	5836066	5836066	5836066	5836066	5836066	5836066	5836066	5836066	5836066	5836066	5836066	5836066	5836066	5836066	5836066	5836066	5836066	5836066	5836066	5836066	5836066	5836066	5836066	5836066	5836066	5836066	5836066	5836066	5836066	5836066	5836066	5836066	5836066	5836066	5836066	5836066	5836066	5836066	5836066	5836066	5836066	5836066	5836066	5836066	5836066	5836066	5836066	5836066	5836066
aligned_concordantly_0_times	336942	522242	414573	629894	1126763	601480	775228	1131824	687185	304925	233320	290855	380261	284962	433783	386816	363464	426774	342246	492950	451763	408444	535485	351279	301766	399708	295586	391232	390374	304711	522057	410260	540644	513269	417805	502260	655443	753851	549281	553112	491296	441048	602655	679403	590930	301239	272035	413204	301268
aligned_concordantly_exactly_1_time	2612483	3312004	4415366	5203786	399130	1839546	2181583	1037452	2274009	1043281	994308	974665	826888	1005441	1031018	1059060	1002240	1286795	1307689	592724	860953	804719	1100456	854286	1223820	845165	1045377	1180192	1276305	1137372	1026942	945836	950523	1468351	994806	638168	494706	700457	483498	558418	937418	597955	897527	452290	893578	831392	831037	724624	789822
aligned_concordantly_>1_times	2886641	2001820	1006127	2386	4310173	3395040	2879255	3666790	2874872	4487860	4608438	4570546	4628917	4545663	4371265	4390190	4470362	4122497	4186131	4750392	4523350	4622903	4200125	4630501	4310480	4591193	4495103	4264642	4169387	4393983	4287067	4479970	4344899	3854446	4423455	4695638	4685917	4381758	4803287	4724536	4407352	4797063	4335884	4704373	4351558	4703435	4732994	4698238	4744976
pairs_aligned_concordantly_0_times	336942	522242	414573	629894	1126763	601480	775228	1131824	687185	304925	233320	290855	380261	284962	433783	386816	363464	426774	342246	492950	451763	408444	535485	351279	301766	399708	295586	391232	390374	304711	522057	410260	540644	513269	417805	502260	655443	753851	549281	553112	491296	441048	602655	679403	590930	301239	272035	413204	301268
aligned_discordantly_1_time	15865	10570	17767	48590	4831	5576	5042	17801	4782	9277	5926	7861	5959	9092	10882	7082	8971	9750	9673	3586	5890	5569	9850	5847	11555	4430	7138	8596	6396	7279	16319	10796	8950	10812	8093	4550	3234	10068	3042	3633	9010	4228	8964	2556	7831	5263	6377	5891	7527
pairs_aligned_0_times_concordantly_or_discordantly	321077	511672	396806	581304	1121932	595904	770186	1114023	682403	295648	227394	282994	374302	275870	422901	379734	354493	417024	332573	489364	445873	402875	525635	345432	290211	395278	288448	382636	383978	297432	505738	399464	531694	502457	409712	497710	652209	743783	546239	549479	482286	436820	593691	676847	583099	295976	265658	407313	293741
mates_make_up_the_pairs	642154	1023344	793612	1162608	2243864	1191808	1540372	2228046	1364806	591296	454788	565988	748604	551740	845802	759468	708986	834048	665146	978728	891746	805750	1051270	690864	580422	790556	576896	765272	767956	594864	1011476	798928	1063388	1004914	819424	995420	1304418	1487566	1092478	1098958	964572	873640	1187382	1353694	1166198	591952	531316	814626	587482
aligned_0_times	367969	795019	586746	936968	2003675	907227	1272643	991320	1122895	362264	243966	309004	503545	314815	582421	325438	447539	657619	467334	805397	681319	599518	520520	495530	402099	614896	399789	584786	337582	418188	821037	560671	835832	448578	604450	776758	1096835	844508	888581	833839	431524	630285	641985	1116979	625910	387789	315184	595115	365635
aligned_exactly_1_time	177631	143152	171256	224468	103134	118599	101374	529823	100892	104234	87835	123076	107784	103921	139811	161246	139786	80457	91855	55194	71488	70331	210506	67154	79852	63002	67655	76783	169614	78862	75547	98445	94644	236887	95784	76448	54505	300903	54898	72345	194655	75692	201338	58494	197314	78556	89198	83818	87058
aligned_>1_times	96554	85173	35610	1172	137055	165982	166355	706903	141019	124798	122987	133908	137275	133004	123570	272784	121661	95972	105957	118137	138939	135901	320244	128180	98471	112658	109452	103703	260760	97814	114892	139812	132912	319449	119190	142214	153078	342155	148999	192774	338393	167663	344059	178221	342974	125607	126934	135693	134789
overall_alignment_rate	0.9685	0.9319	0.9497	0.9197	0.8283	0.9223	0.891	0.9151	0.9038	0.969	0.9791	0.9735	0.9569	0.973	0.9501	0.9721	0.9617	0.9437	0.96	0.931	0.9416	0.9486	0.9554	0.9575	0.9656	0.9473	0.9657	0.9499	0.9711	0.9642	0.9297	0.952	0.9284	0.9616	0.9482	0.9335	0.906	0.9276	0.9239	0.9286	0.963	0.946	0.945	0.9043	0.9464	0.9668	0.973	0.949	0.9687
Assembly	transabyss	trinity	rnaspades	megahit	idba_tran	shannon	binpacker	tadpole	translig	transabyss_trinity	transabyss_rnaspades	transabyss_megahit	transabyss_idba_tran	transabyss_shannon	transabyss_binpacker	transabyss_tadpole	transabyss_translig	trinity_rnaspades	trinity_megahit	trinity_idba_tran	trinity_shannon	trinity_binpacker	trinity_tadpole	trinity_translig	rnaspades_megahit	rnaspades_idba_tran	rnaspades_shannon	rnaspades_binpacker	rnaspades_tadpole	rnaspades_translig	megahit_idba_tran	megahit_shannon	megahit_binpacker	megahit_tadpole	megahit_translig	idba_tran_shannon	idba_tran_binpacker	idba_tran_tadpole	idba_tran_translig	shannon_binpacker	shannon_tadpole	shannon_translig	binpacker_tadpole	binpacker_translig	tadpole_translig	transabyss_trinity_rnaspades	transabyss_trinity_megahit	transabyss_trinity_idba_tran	transabyss_trinity_shannon
Busco_compared_to_Megahit	-0.0298507	-0.119403	-0.0223881	0	0.291667	0.166667	0.0416667	-0.5	0.0416667	0.0416667	0.25	0.25	0.416667	0.333333	0.25	-0.0223881	0.25	0.208333	0.208333	0.375	0.208333	0.208333	-0.104478	0.166667	0.208333	0.416667	0.333333	0.333333	0.0416667	0.333333	0.333333	0.375	0.333333	0.0833333	0.333333	0.416667	0.458333	0.291667	0.458333	0.291667	0.208333	0.291667	0.166667	0.25	0.125	0.333333	0.458333	0.458333	0.333333
Hisat2_compared_to_Megahit	0.400657	0.100164	0.246305	0	-0.5	0.0213465	-0.157002	-0.0251641	-0.0869803	0.404762	0.487685	0.441708	0.305419	0.437603	0.249589	0.430213	0.344828	0.197044	0.33087	0.092775	0.179803	0.237274	0.293103	0.310345	0.376847	0.226601	0.377668	0.247947	0.422003	0.365353	0.0821018	0.265189	0.0714286	0.344007	0.23399	0.1133	-0.0749453	0.0648604	0.0344828	0.0730706	0.355501	0.215928	0.207718	-0.0842451	0.219212	0.3867	0.437603	0.240558	0.402299
n50_compared_to_Megahit	0.116366	-0.096473	-0.0840249	0	0.21021	0.0795796	0.363363	-0.5	0.5	0.0315315	0.039039	0.0690691	0.191441	0.0968468	0.239489	-0.288382	0.287538	-0.0892116	-0.0539419	0.166667	0.021021	0.162913	-0.393154	0.207958	-0.0446058	0.17042	0.027027	0.177928	-0.396266	0.225976	0.183183	0.0518018	0.219219	-0.389004	0.277778	0.181682	0.238739	0.042042	0.254505	0.205706	-0.273859	0.244745	-0.186722	0.427177	-0.177386	0.00525526	0.0232733	0.158408	0.0518018
n90_compared_to_Megahit	-0.23	-0.323333	-0.296667	0	0.159763	-0.253333	0.236686	-0.5	0.5	-0.273333	-0.263333	-0.13	0.0769231	-0.243333	-0.07	-0.466667	-0.0233333	-0.31	-0.173333	0.0650888	-0.283333	-0.126667	-0.476667	-0.0833333	-0.16	0.0769231	-0.273333	-0.103333	-0.473333	-0.05	0.133136	-0.153333	0.0976331	-0.47	0.189349	0.0621302	0.171598	-0.246667	0.198225	-0.106667	-0.46	-0.07	-0.456667	0.369822	-0.46	-0.283333	-0.193333	0.0147929	-0.266667
Average Assessment Score	0.104663	-0.0763807	0.0111905	0	-0.00778219	0.0337121	0.0615631	-0.341721	0.151562	0.108509	0.208513	0.220414	0.285423	0.232564	0.194778	0.0101004	0.24231	0.0685906	0.141855	0.194551	0.08566	0.154577	-0.0820948	0.179775	0.160959	0.255646	0.195949	0.206193	0.0096235	0.262225	0.191198	0.196474	0.187729	-0.000720724	0.266962	0.217291	0.196185	0.0847383	0.239727	0.138086	0.0656349	0.198322	0.0175633	0.188085	0.00850629	0.193665	0.270302	0.261831	0.2094
Adspersus	transabyss	trinity	rnaspades	megahit	idba_tran	shannon	binpacker	tadpole	translig	transabyss_trinity	transabyss_rnaspades	transabyss_megahit	transabyss_idba_tran	transabyss_shannon	transabyss_binpacker	transabyss_tadpole	transabyss_translig	trinity_rnaspades	trinity_megahit	trinity_idba_tran	trinity_shannon	trinity_binpacker	trinity_tadpole	trinity_translig	rnaspades_megahit	rnaspades_idba_tran	rnaspades_shannon	rnaspades_binpacker	rnaspades_tadpole	rnaspades_translig	megahit_idba_tran	megahit_shannon	megahit_binpacker	megahit_tadpole	megahit_translig	idba_tran_shannon	idba_tran_binpacker	idba_tran_tadpole	idba_tran_translig	shannon_binpacker	shannon_tadpole	shannon_translig	binpacker_tadpole	binpacker_translig	tadpole_translig	transabyss_trinity_rnaspades	transabyss_trinity_megahit	transabyss_trinity_idba_tran	transabyss_trinity_shannon
mean_orf_percent	56.5485	61.0271	54.3675	56.9327	54.7303	51.3709	52.4739	68.4702	51.7531	58.1746	55.6147	56.6958	55.1194	53.6316	54.7335	63.4101	54.5691	57.2463	58.8907	55.5764	54.33	56.0246	66.2672	55.9063	55.5316	54.6689	52.4713	53.3875	63.4534	53.1016	55.0493	53.1801	54.42	64.8419	54.1849	53.857	54.3254	58.4354	54.2521	51.7941	60.1331	51.5057	62.5198	52.1375	62.7631	56.9453	57.8222	55.7618	55.1056
n90	378	291	320	325	526	347	592	260	740	335	350	355	488	361	453	282	497	306	307	472	323	397	266	429	323	482	336	426	271	471	486	339	435	270	489	474	538	377	557	421	281	451	289	656	289	330	332	452	340
n70	999	616	955	797	1227	961	1326	483	1572	843	984	926	1176	979	1134	605	1210	775	700	1128	833	978	508	1059	879	1187	960	1152	559	1258	1164	906	1083	535	1183	1159	1244	891	1280	1097	610	1161	637	1440	650	874	832	1101	891
n50	1871	1260	2020	1628	2059	1789	2203	951	2435	1650	1926	1783	2019	1826	2015	1282	2096	1660	1445	1959	1627	1816	1023	1908	1834	2054	1867	2121	1218	2236	2003	1742	1961	1106	2062	1994	2084	1749	2117	1952	1297	2019	1329	2314	1370	1758	1645	1941	1712
n30	3074	2169	3444	2677	3122	2874	3323	2228	3595	2723	3229	2928	3111	2962	3186	2750	3301	2834	2429	3004	2645	2844	2201	2974	3082	3170	3076	3382	2888	3519	3067	2817	3061	2451	3179	3066	3155	3015	3197	3061	2669	3140	2887	3455	3020	2947	2710	3015	2791
n10	6936	3875	7138	4556	4993	4783	5287	8900	5527	5298	7057	5484	5186	5275	5746	12498	5934	5512	4257	4880	4535	4814	10795	4936	5645	5237	5397	5922	12598	6063	4940	4709	5009	12570	5151	4940	5067	6543	5101	4992	12517	5093	14706	5429	20637	5885	5010	5062	4992
Complete_BUSCOs_(C)	228	193	234	222	233	227	228	189	228	229	236	231	233	233	233	232	230	235	226	233	230	231	211	228	233	238	239	236	237	236	233	231	231	227	230	233	236	233	234	234	229	232	232	232	230	238	233	233	233
Complete_and_single-copy_BUSCOs_(S)	153	178	229	222	3	149	184	53	186	41	21	15	3	10	15	50	13	64	57	2	41	51	49	46	25	9	23	18	73	18	2	13	21	62	24	2	6	4	3	11	47	13	52	13	52	17	8	2	8
Complete_and_duplicated_BUSCOs_(D)	75	15	5	0	230	78	44	136	42	188	215	216	230	223	218	182	217	171	169	231	189	180	162	182	208	229	216	218	164	218	231	218	210	165	206	231	230	229	231	223	182	219	180	219	178	221	225	231	225
Fragmented_BUSCOs_(F)	18	40	12	20	14	20	16	46	16	17	12	16	15	16	15	17	17	13	19	15	19	16	29	17	14	12	12	12	13	12	15	17	15	20	16	15	13	14	14	17	20	18	16	15	16	12	16	15	16
Missing_BUSCOs_(M)	9	22	9	13	8	8	11	20	11	9	7	8	7	6	7	6	8	7	10	7	6	8	15	10	8	5	4	7	5	7	7	7	9	8	9	7	6	8	7	4	6	5	7	8	9	5	6	7	6
Total_BUSCO_groups_searched	255	255	255	255	255	255	255	255	255	255	255	255	255	255	255	255	255	255	255	255	255	255	255	255	255	255	255	255	255	255	255	255	255	255	255	255	255	255	255	255	255	255	255	255	255	255	255	255	255
reads	9952289	9952289	9952289	9952289	9952289	9952289	9952289	9952289	9952289	9952289	9952289	9952289	9952289	9952289	9952289	9952289	9952289	9952289	9952289	9952289	9952289	9952289	9952289	9952289	9952289	9952289	9952289	9952289	9952289	9952289	9952289	9952289	9952289	9952289	9952289	9952289	9952289	9952289	9952289	9952289	9952289	9952289	9952289	9952289	9952289	9952289	9952289	9952289	9952289
were_paired	9952289	9952289	9952289	9952289	9952289	9952289	9952289	9952289	9952289	9952289	9952289	9952289	9952289	9952289	9952289	9952289	9952289	9952289	9952289	9952289	9952289	9952289	9952289	9952289	9952289	9952289	9952289	9952289	9952289	9952289	9952289	9952289	9952289	9952289	9952289	9952289	9952289	9952289	9952289	9952289	9952289	9952289	9952289	9952289	9952289	9952289	9952289	9952289	9952289
aligned_concordantly_0_times	886916	1422156	928357	1150220	1326668	1054046	1384465	2070659	1300517	894753	731978	835631	984496	862378	874698	926292	861325	785059	954337	1130215	1009753	1028669	1215628	1051379	781447	919369	836666	789955	867304	759751	1075327	951064	958345	1075841	934673	1022191	1257549	1257762	1162455	1005074	1075091	967594	1193137	1154430	1128492	749900	845054	1016971	903076
aligned_concordantly_exactly_1_time	3374055	6073473	8229611	8801414	369873	3039086	5754816	802905	6128408	1060685	665816	580597	609322	568605	677600	956775	699738	1485109	1237098	425304	753367	997623	1144282	945034	992877	614099	598067	963795	1423420	1093727	487038	491711	921865	1422432	888231	406193	334564	679105	387739	331923	641407	411643	784357	421862	1046968	715215	674406	667170	583938
aligned_concordantly_>1_times	5691318	2456660	794321	655	8255748	5859157	2813008	7078725	2523364	7996851	8554495	8536061	8358471	8521306	8399991	8069222	8391226	7682121	7760854	8396770	8189169	7925997	7592379	7955876	8177965	8418821	8517556	8198539	7661565	8098811	8389924	8509514	8072079	7454016	8129385	8523905	8360176	8015422	8402095	8615292	8235791	8573052	7974795	8375997	7776829	8487174	8432829	8268148	8465275
pairs_aligned_concordantly_0_times	886916	1422156	928357	1150220	1326668	1054046	1384465	2070659	1300517	894753	731978	835631	984496	862378	874698	926292	861325	785059	954337	1130215	1009753	1028669	1215628	1051379	781447	919369	836666	789955	867304	759751	1075327	951064	958345	1075841	934673	1022191	1257549	1257762	1162455	1005074	1075091	967594	1193137	1154430	1128492	749900	845054	1016971	903076
aligned_discordantly_1_time	59074	64443	158399	161749	6739	29869	93561	50997	64382	36935	14387	13881	16412	17071	24544	21026	31038	23001	17991	3052	13116	11520	18325	8743	14837	11523	11132	16730	19170	19123	13585	8363	16009	22324	14662	5408	5103	24931	4486	5417	13518	9480	19382	4998	16550	13694	13231	16822	15467
pairs_aligned_0_times_concordantly_or_discordantly	827842	1357713	769958	988471	1319929	1024177	1290904	2019662	1236135	857818	717591	821750	968084	845307	850154	905266	830287	762058	936346	1127163	996637	1017149	1197303	1042636	766610	907846	825534	773225	848134	740628	1061742	942701	942336	1053517	920011	1016783	1252446	1232831	1157969	999657	1061573	958114	1173755	1149432	1111942	736206	831823	1000149	887609
mates_make_up_the_pairs	1655684	2715426	1539916	1976942	2639858	2048354	2581808	4039324	2472270	1715636	1435182	1643500	1936168	1690614	1700308	1810532	1660574	1524116	1872692	2254326	1993274	2034298	2394606	2085272	1533220	1815692	1651068	1546450	1696268	1481256	2123484	1885402	1884672	2107034	1840022	2033566	2504892	2465662	2315938	1999314	2123146	1916228	2347510	2298864	2223884	1472412	1663646	2000298	1775218
aligned_0_times	1200280	2238468	1161588	1617758	2231562	1598923	2147427	2044864	2042235	1240451	977234	1156772	1490248	1195719	1233842	1178057	1201636	1107021	1454191	1886133	1535610	1624777	1577068	1695832	1071557	1393183	1218042	1106105	1054502	1062056	1734536	1440353	1470081	1378698	1434409	1642111	2110898	1734032	1946292	1546105	1410965	1478998	1557911	1761871	1504781	1023518	1187247	1548448	1287442
aligned_exactly_1_time	264818	333484	305185	356553	105279	191464	244589	770893	244353	208302	145251	162325	162333	168623	184537	227007	194509	174225	156182	66051	131342	117619	280691	113025	165813	148988	130504	164117	253200	165410	109619	118585	148836	295886	147178	93979	94891	280129	77268	97113	240280	116130	298597	111017	267797	139515	159789	164193	162200
aligned_>1_times	190586	143474	73143	2631	303017	257967	189792	1223567	185682	266883	312697	324403	283587	326272	281929	405468	264429	242870	262319	302142	326322	291902	536847	276415	295850	273521	302522	276228	388566	253790	279329	326464	265755	432450	258435	297476	299103	451501	292378	356096	471901	321100	491002	425976	451306	309379	316610	287657	325576
overall_alignment_rate	0.9397	0.8875	0.9416	0.9187	0.8879	0.9197	0.8921	0.8973	0.8974	0.9377	0.9509	0.9419	0.9251	0.9399	0.938	0.9408	0.9396	0.9444	0.9269	0.9052	0.9229	0.9184	0.9208	0.9148	0.9462	0.93	0.9388	0.9444	0.947	0.9466	0.9129	0.9276	0.9261	0.9307	0.9279	0.9175	0.8939	0.9129	0.9022	0.9223	0.9291	0.9257	0.9217	0.9115	0.9244	0.9486	0.9404	0.9222	0.9353
Assembly	transabyss	trinity	rnaspades	megahit	idba_tran	shannon	binpacker	tadpole	translig	transabyss_trinity	transabyss_rnaspades	transabyss_megahit	transabyss_idba_tran	transabyss_shannon	transabyss_binpacker	transabyss_tadpole	transabyss_translig	trinity_rnaspades	trinity_megahit	trinity_idba_tran	trinity_shannon	trinity_binpacker	trinity_tadpole	trinity_translig	rnaspades_megahit	rnaspades_idba_tran	rnaspades_shannon	rnaspades_binpacker	rnaspades_tadpole	rnaspades_translig	megahit_idba_tran	megahit_shannon	megahit_binpacker	megahit_tadpole	megahit_translig	idba_tran_shannon	idba_tran_binpacker	idba_tran_tadpole	idba_tran_translig	shannon_binpacker	shannon_tadpole	shannon_translig	binpacker_tadpole	binpacker_translig	tadpole_translig	transabyss_trinity_rnaspades	transabyss_trinity_megahit	transabyss_trinity_idba_tran	transabyss_trinity_shannon
Busco_compared_to_Megahit	0.176471	-0.439394	0.352941	0	0.323529	0.147059	0.176471	-0.5	0.176471	0.205882	0.411765	0.264706	0.323529	0.323529	0.323529	0.294118	0.235294	0.382353	0.117647	0.323529	0.235294	0.264706	-0.166667	0.176471	0.323529	0.470588	0.5	0.411765	0.441176	0.411765	0.323529	0.264706	0.264706	0.147059	0.235294	0.323529	0.411765	0.323529	0.352941	0.352941	0.205882	0.294118	0.294118	0.294118	0.235294	0.470588	0.323529	0.323529	0.323529
Hisat2_compared_to_Megahit	0.321101	-0.5	0.350153	0	-0.49359	0.0152905	-0.426282	-0.342949	-0.341346	0.29052	0.492355	0.35474	0.0978593	0.324159	0.295107	0.33792	0.319572	0.392966	0.125382	-0.216346	0.0642202	-0.00480769	0.0321101	-0.0625	0.420489	0.172783	0.307339	0.392966	0.432722	0.426606	-0.0929487	0.136086	0.11315	0.183486	0.140673	-0.0192308	-0.397436	-0.0929487	-0.264423	0.0550459	0.159021	0.107034	0.0458716	-0.115385	0.087156	0.457187	0.331804	0.0535168	0.253823
n50_compared_to_Megahit	0.150558	-0.271787	0.242875	0	0.267038	0.0997522	0.356258	-0.5	0.5	0.0136307	0.184634	0.0960347	0.242255	0.122677	0.239777	-0.255539	0.289963	0.0198265	-0.135155	0.205081	-0.000738552	0.116481	-0.446824	0.173482	0.127633	0.263941	0.148079	0.305452	-0.302806	0.376704	0.232342	0.070632	0.20632	-0.385524	0.268897	0.226766	0.282528	0.074969	0.302974	0.200743	-0.244461	0.242255	-0.220827	0.425031	-0.190547	0.0805452	0.0105328	0.193928	0.0520446
n90_compared_to_Megahit	0.0638554	-0.261538	-0.0384615	0	0.242169	0.026506	0.321687	-0.5	0.5	0.0120482	0.0301205	0.0361446	0.196386	0.0433735	0.154217	-0.330769	0.207229	-0.146154	-0.138462	0.177108	-0.0153846	0.086747	-0.453846	0.125301	-0.0153846	0.189157	0.013253	0.121687	-0.415385	0.175904	0.193976	0.0168675	0.13253	-0.423077	0.19759	0.179518	0.256627	0.0626506	0.279518	0.115663	-0.338462	0.151807	-0.276923	0.398795	-0.276923	0.0060241	0.00843373	0.153012	0.0180723
Average Assessment Score	0.201593	-0.402019	0.268434	0	0.0281811	0.0751595	0.0297203	-0.44765	0.111708	0.169747	0.337166	0.228512	0.21357	0.243571	0.271878	0.112961	0.267821	0.237385	0.035407	0.0994259	0.0971509	0.120504	-0.194964	0.0877874	0.266714	0.289973	0.296002	0.339434	0.171601	0.371558	0.147913	0.14818	0.182427	-0.0245852	0.20307	0.169147	0.0946353	0.0997968	0.126588	0.18873	0.0244809	0.199394	0.0303714	0.196882	0.0295718	0.323686	0.221606	0.183505	0.204137
Catebeianus	transabyss	trinity	rnaspades	megahit	idba_tran	shannon	binpacker	tadpole	translig	transabyss_trinity	transabyss_rnaspades	transabyss_megahit	transabyss_idba_tran	transabyss_shannon	transabyss_binpacker	transabyss_tadpole	transabyss_translig	trinity_rnaspades	trinity_megahit	trinity_idba_tran	trinity_shannon	trinity_binpacker	trinity_tadpole	trinity_translig	rnaspades_megahit	rnaspades_idba_tran	rnaspades_shannon	rnaspades_binpacker	rnaspades_tadpole	rnaspades_translig	megahit_idba_tran	megahit_shannon	megahit_binpacker	megahit_tadpole	megahit_translig	idba_tran_shannon	idba_tran_binpacker	idba_tran_tadpole	idba_tran_translig	shannon_binpacker	shannon_tadpole	shannon_translig	binpacker_tadpole	binpacker_translig	tadpole_translig	transabyss_trinity_rnaspades	transabyss_trinity_megahit	transabyss_trinity_idba_tran	transabyss_trinity_shannon
mean_orf_percent	51.4289	53.53	51.0926	48.5286	48.9131	44.4124	45.0961	64.5896	40.3219	52.2634	51.2812	50.3737	49.4912	47.0491	48.4811	58.8433	46.3662	52.2066	51.206	49.6715	47.0018	48.7287	60.8511	46.1372	50.01	49.3257	46.5519	47.9345	59.4935	45.5248	48.857	45.4667	46.4568	59.6568	43.6519	47.4218	48.1259	53.2702	47.1955	44.6476	53.2334	43.0412	56.7345	42.7555	55.0371	51.8881	51.3059	50.0222	48.3353
n90	311	268	259	403	423	312	467	240	646	290	284	345	396	311	356	256	391	263	321	388	294	326	246	359	310	382	288	312	245	336	420	340	430	257	511	389	429	329	448	346	260	371	260	546	263	279	317	373	299
n70	735	488	496	768	845	716	983	402	1395	625	627	748	819	724	841	490	975	492	605	777	637	731	422	870	608	777	638	731	425	865	833	731	889	467	1086	803	872	649	928	803	513	892	524	1159	564	583	661	769	667
n50	1556	988	1084	1434	1534	1379	1747	827	2397	1327	1357	1511	1538	1444	1644	1105	1916	1038	1194	1444	1270	1416	870	1728	1240	1456	1291	1449	904	1750	1519	1392	1619	980	1962	1481	1575	1327	1675	1501	1113	1677	1153	2033	1343	1254	1353	1466	1353
n30	3114	1939	2175	2430	2511	2370	2800	7267	3732	2587	2657	2821	2614	2601	2941	3471	3446	2064	2177	2427	2255	2453	2583	3005	2285	2456	2316	2530	2702	3041	2498	2384	2657	3012	3228	2467	2567	2618	2752	2526	2603	2836	3136	3252	3998	2448	2539	2532	2469
n10	11010	3881	4274	4444	4413	4328	4902	7267	6202	11010	16046	17225	5118	5847	8898	11010	16588	4095	4162	4328	4207	4491	10795	5377	4348	4389	4311	4628	16046	5431	4416	4362	4721	17225	5566	4388	4513	17279	4811	4538	16299	5060	11006	5609	18151	5960	6364	4930	5299
Complete_BUSCOs_(C)	197	154	201	198	200	197	198	152	198	197	204	201	203	201	202	197	202	200	199	202	197	198	171	198	202	205	202	203	202	202	201	199	199	198	200	203	203	200	202	199	197	200	198	200	199	207	203	204	203
Complete_and_single-copy_BUSCOs_(S)	149	144	200	198	0	109	161	50	161	54	25	13	3	12	17	53	17	71	68	2	42	59	48	58	20	8	10	15	73	14	1	5	11	66	12	2	4	2	2	6	43	7	56	6	59	22	13	4	10
Complete_and_duplicated_BUSCOs_(D)	48	10	1	0	200	88	37	102	37	143	179	188	200	189	185	144	185	129	131	200	155	139	123	140	182	197	192	188	129	188	200	194	188	132	188	201	199	198	200	193	154	193	142	194	140	185	190	200	193
Fragmented_BUSCOs_(F)	38	58	36	33	35	36	32	66	29	40	35	35	36	35	34	41	34	38	35	36	37	35	53	32	35	36	37	33	37	34	35	36	33	39	31	36	34	37	34	35	37	33	36	30	35	36	36	37	35
Missing_BUSCOs_(M)	20	43	18	24	20	22	25	37	28	18	16	19	16	19	19	17	19	17	21	17	21	22	31	25	18	14	16	19	16	19	19	20	23	18	24	16	18	18	19	21	21	22	21	25	21	12	16	14	17
Total_BUSCO_groups_searched	255	255	255	255	255	255	255	255	255	255	255	255	255	255	255	255	255	255	255	255	255	255	255	255	255	255	255	255	255	255	255	255	255	255	255	255	255	255	255	255	255	255	255	255	255	255	255	255	255
reads	6686624	6686624	6686624	6686624	6686624	6686624	6686624	6686624	6686624	6686624	6686624	6686624	6686624	6686624	6686624	6686624	6686624	6686624	6686624	6686624	6686624	6686624	6686624	6686624	6686624	6686624	6686624	6686624	6686624	6686624	6686624	6686624	6686624	6686624	6686624	6686624	6686624	6686624	6686624	6686624	6686624	6686624	6686624	6686624	6686624	6686624	6686624	6686624	6686624
were_paired	6686624	6686624	6686624	6686624	6686624	6686624	6686624	6686624	6686624	6686624	6686624	6686624	6686624	6686624	6686624	6686624	6686624	6686624	6686624	6686624	6686624	6686624	6686624	6686624	6686624	6686624	6686624	6686624	6686624	6686624	6686624	6686624	6686624	6686624	6686624	6686624	6686624	6686624	6686624	6686624	6686624	6686624	6686624	6686624	6686624	6686624	6686624	6686624	6686624
aligned_concordantly_0_times	1036068	1531592	1127667	1331234	1347784	1332527	1703602	1716106	1467781	1021295	902266	984238	1133606	984825	1034876	1064774	999885	1010443	1190779	1237869	1194434	1297146	1284335	1268344	1006938	1060228	1024259	1056651	1043027	1004343	1329725	1114458	1228170	1206615	1189535	1129120	1374288	1208164	1343010	1293999	1206200	1216776	1314960	1400395	1246836	903986	985487	1140287	991835
aligned_concordantly_exactly_1_time	2287588	3557453	5322018	5351411	216097	1521153	3017406	846094	2735194	872403	672970	668176	527319	642806	791630	808503	697965	1132041	993709	516251	610588	803364	833619	693212	892114	592774	706758	1087512	1165798	915858	316616	657833	931048	1052205	721704	370528	359223	485278	353319	378753	647464	430269	804914	404652	720478	629407	634735	569054	608528
aligned_concordantly_>1_times	3362968	1597579	236939	3979	5122743	3832944	1965616	4124424	2483649	4792926	5111388	5034210	5025699	5058993	4860118	4813347	4988774	4544140	4502136	4932504	4881602	4586114	4568670	4725068	4787572	5033622	4955607	4542461	4477799	4766423	5040283	4914333	4527406	4427804	4775385	5186976	4953113	4993182	4990295	5013872	4832960	5039579	4566750	4881577	4719310	5153231	5066402	4977283	5086261
pairs_aligned_concordantly_0_times	1036068	1531592	1127667	1331234	1347784	1332527	1703602	1716106	1467781	1021295	902266	984238	1133606	984825	1034876	1064774	999885	1010443	1190779	1237869	1194434	1297146	1284335	1268344	1006938	1060228	1024259	1056651	1043027	1004343	1329725	1114458	1228170	1206615	1189535	1129120	1374288	1208164	1343010	1293999	1206200	1216776	1314960	1400395	1246836	903986	985487	1140287	991835
aligned_discordantly_1_time	64471	93488	176914	166944	4642	23778	64783	31800	47617	30097	17946	23966	16194	22007	33288	18335	25902	19954	16116	5282	11070	14389	17857	11161	17538	9236	11466	22495	17325	18326	5768	11889	16487	18754	11457	5858	5127	9259	4396	5456	15240	7904	21345	5777	14864	15996	20276	15195	19054
pairs_aligned_0_times_concordantly_or_discordantly	971597	1438104	950753	1164290	1343142	1308749	1638819	1684306	1420164	991198	884320	960272	1117412	962818	1001588	1046439	973983	990489	1174663	1232587	1183364	1282757	1266478	1257183	989400	1050992	1012793	1034156	1025702	986017	1323957	1102569	1211683	1187861	1178078	1123262	1369161	1198905	1338614	1288543	1190960	1208872	1293615	1394618	1231972	887990	965211	1125092	972781
mates_make_up_the_pairs	1943194	2876208	1901506	2328580	2686284	2617498	3277638	3368612	2840328	1982396	1768640	1920544	2234824	1925636	2003176	2092878	1947966	1980978	2349326	2465174	2366728	2565514	2532956	2514366	1978800	2101984	2025586	2068312	2051404	1972034	2647914	2205138	2423366	2375722	2356156	2246524	2738322	2397810	2677228	2577086	2381920	2417744	2587230	2789236	2463944	1775980	1930422	2250184	1945562
aligned_0_times	1239075	2302814	1467469	2003109	2072685	1846892	2669332	1946907	2222301	1228676	991057	1176281	1501475	1133911	1247875	1174080	1168318	1275232	1722314	1827945	1584358	1850611	1541737	1793332	1269944	1404630	1291626	1366371	1193661	1261864	2035492	1491313	1783974	1478285	1690707	1555197	2116030	1585534	2025914	1772254	1420472	1642055	1603172	2076602	1526580	1002489	1188850	1511535	1152399
aligned_exactly_1_time	375282	355223	366732	318483	86784	234621	325195	555266	262470	280454	248359	261402	212194	239083	287598	339999	276718	245378	197404	116187	189159	215236	355849	190818	230225	189610	186795	244523	326426	215112	109951	184021	220974	359118	188254	126465	129338	235416	108868	150982	286875	159945	366377	156951	306652	237634	245711	211948	229846
aligned_>1_times	328837	218171	67305	6988	526815	535985	283111	866439	355557	473266	529224	482861	521155	552642	467703	578799	502930	460368	429608	521042	593211	499667	635370	530216	478631	507744	547165	457418	531317	495058	502471	529804	418418	538319	477195	564862	492954	576860	542446	653850	674573	615744	617681	555683	630712	535857	495861	526701	563317
overall_alignment_rate	0.9073	0.8278	0.8903	0.8502	0.845	0.8619	0.8004	0.8544	0.8338	0.9081	0.9259	0.912	0.8877	0.9152	0.9067	0.9122	0.9126	0.9046	0.8712	0.8633	0.8815	0.8616	0.8847	0.8659	0.905	0.895	0.9034	0.8978	0.9107	0.9056	0.8478	0.8885	0.8666	0.8895	0.8736	0.8837	0.8418	0.8814	0.8485	0.8675	0.8938	0.8772	0.8801	0.8447	0.8858	0.925	0.9111	0.887	0.9138
Assembly	transabyss	trinity	rnaspades	megahit	idba_tran	shannon	binpacker	tadpole	translig	transabyss_trinity	transabyss_rnaspades	transabyss_megahit	transabyss_idba_tran	transabyss_shannon	transabyss_binpacker	transabyss_tadpole	transabyss_translig	trinity_rnaspades	trinity_megahit	trinity_idba_tran	trinity_shannon	trinity_binpacker	trinity_tadpole	trinity_translig	rnaspades_megahit	rnaspades_idba_tran	rnaspades_shannon	rnaspades_binpacker	rnaspades_tadpole	rnaspades_translig	megahit_idba_tran	megahit_shannon	megahit_binpacker	megahit_tadpole	megahit_translig	idba_tran_shannon	idba_tran_binpacker	idba_tran_tadpole	idba_tran_translig	shannon_binpacker	shannon_tadpole	shannon_translig	binpacker_tadpole	binpacker_translig	tadpole_translig	transabyss_trinity_rnaspades	transabyss_trinity_megahit	transabyss_trinity_idba_tran	transabyss_trinity_shannon
Busco_compared_to_Megahit	-0.0108696	-0.478261	0.166667	0	0.111111	-0.0108696	0	-0.5	0	-0.0108696	0.333333	0.166667	0.277778	0.166667	0.222222	-0.0108696	0.222222	0.111111	0.0555556	0.222222	-0.0108696	0	-0.293478	0	0.222222	0.388889	0.222222	0.277778	0.222222	0.222222	0.166667	0.0555556	0.0555556	0	0.111111	0.277778	0.277778	0.111111	0.222222	0.0555556	-0.0108696	0.111111	0	0.111111	0.0555556	0.5	0.277778	0.333333	0.277778
Hisat2_compared_to_Megahit	0.368387	-0.2249	0.25871	0	-0.0522088	0.0754839	-0.5	0.0270968	-0.164659	0.373548	0.488387	0.39871	0.241935	0.419355	0.364516	0.4	0.402581	0.350968	0.135484	0.0845161	0.201935	0.0735484	0.222581	0.10129	0.353548	0.289032	0.343226	0.307097	0.390323	0.357419	-0.0240964	0.247097	0.105806	0.253548	0.150968	0.216129	-0.0843373	0.20129	-0.0170683	0.111613	0.28129	0.174194	0.192903	-0.0552209	0.229677	0.482581	0.392903	0.237419	0.410323
n50_compared_to_Megahit	0.0633437	-0.367381	-0.288303	0	0.0519211	-0.0453048	0.162513	-0.5	0.5	-0.0881384	-0.0634267	0.0399792	0.0539979	0.00519211	0.109034	-0.271005	0.25026	-0.326194	-0.197694	0.00519211	-0.135091	-0.014827	-0.46458	0.152648	-0.159802	0.0114226	-0.117792	0.00778816	-0.436573	0.164071	0.0441329	-0.0345964	0.096054	-0.37397	0.274143	0.0244029	0.0732087	-0.0881384	0.12513	0.0347871	-0.264415	0.126168	-0.231466	0.311007	-0.0749588	-0.14827	-0.0667216	0.0166147	-0.0667216
n90_compared_to_Megahit	-0.282209	-0.41411	-0.441718	0	0.0411523	-0.279141	0.131687	-0.5	0.5	-0.346626	-0.365031	-0.177914	-0.0214724	-0.282209	-0.144172	-0.45092	-0.0368098	-0.429448	-0.251534	-0.0460123	-0.334356	-0.236196	-0.481595	-0.134969	-0.285276	-0.0644172	-0.352761	-0.279141	-0.484663	-0.205521	0.0349794	-0.193252	0.0555556	-0.447853	0.222222	-0.0429448	0.0534979	-0.226994	0.0925926	-0.174847	-0.43865	-0.0981595	-0.43865	0.294239	-0.429448	-0.380368	-0.263804	-0.0920245	-0.319018
Average Assessment Score	0.082695	-0.364635	0.020122	0	0.0351463	-0.0325362	-0.117633	-0.324301	0.11178	0.0484322	0.202497	0.16547	0.178659	0.149171	0.189723	0.00938928	0.243843	0.0280859	-0.0111914	0.0954428	-0.0145524	-0.0173211	-0.181328	0.0367099	0.117744	0.217141	0.110057	0.149733	0.0506423	0.186305	0.0607088	0.0629095	0.0790556	-0.0524544	0.170087	0.161545	0.0855979	0.0516118	0.104672	0.0323796	-0.0270373	0.0997697	-0.047385	0.119504	0.0110099	0.239421	0.168473	0.177683	0.165077
Femoralis	transabyss	trinity	rnaspades	megahit	idba_tran	shannon	binpacker	tadpole	translig	transabyss_trinity	transabyss_rnaspades	transabyss_megahit	transabyss_idba_tran	transabyss_shannon	transabyss_binpacker	transabyss_tadpole	transabyss_translig	trinity_rnaspades	trinity_megahit	trinity_idba_tran	trinity_shannon	trinity_binpacker	trinity_tadpole	trinity_translig	rnaspades_megahit	rnaspades_idba_tran	rnaspades_shannon	rnaspades_binpacker	rnaspades_tadpole	rnaspades_translig	megahit_idba_tran	megahit_shannon	megahit_binpacker	megahit_tadpole	megahit_translig	idba_tran_shannon	idba_tran_binpacker	idba_tran_tadpole	idba_tran_translig	shannon_binpacker	shannon_tadpole	shannon_translig	binpacker_tadpole	binpacker_translig	tadpole_translig	transabyss_trinity_rnaspades	transabyss_trinity_megahit	transabyss_trinity_idba_tran	transabyss_trinity_shannon
mean_orf_percent	57.3898	57.6487	58.4133	57.3933	55.9434	53.9627	52.0298	69.6656	51.2677	57.5096	57.8598	57.3912	56.219	55.3824	54.7351	65.3174	54.6288	58.0283	57.5377	56.2309	55.3582	54.6565	65.8097	54.534	57.9664	56.3549	55.6328	54.9913	66.09	54.8999	56.139	55.0571	54.1911	66.3954	54.002	55.4487	55.209	60.0643	55.1857	53.1708	62.8069	52.9723	63.4948	51.6825	63.9511	57.7928	57.4791	56.4206	55.9785
n90	300	266	284	374	419	283	436	231	541	283	292	335	393	290	344	241	359	275	315	384	276	316	237	326	325	389	284	330	240	343	411	318	397	241	430	382	421	308	431	320	241	328	243	490	242	283	310	370	283
n70	623	466	506	619	758	561	855	345	959	544	566	621	731	587	726	401	761	485	531	700	519	638	371	668	557	711	538	669	376	704	737	582	743	390	787	709	776	568	789	672	399	699	426	903	427	531	564	687	551
n50	1200	836	926	1037	1258	1052	1461	656	1558	1023	1073	1130	1247	1114	1327	830	1371	879	926	1189	963	1145	710	1178	979	1206	1005	1197	733	1230	1227	1047	1269	753	1314	1212	1290	1081	1303	1215	810	1240	901	1503	907	993	1027	1191	1035
n30	2291	1522	1643	1703	1948	1824	2268	5549	2399	1913	1962	2015	2001	1995	2279	2553	2349	1585	1608	1889	1715	1944	1950	1981	1668	1904	1756	1989	2019	2033	1917	1786	2041	2104	2091	1923	2008	2017	2021	2013	2038	2045	2477	2324	2604	1819	1844	1939	1871
n10	10079	3043	3108	3149	3383	3422	4131	5549	4166	6405	6237	10504	3770	4823	6925	10079	7641	3075	3090	3337	3300	3623	10700	3646	3126	3343	3314	3663	9168	3677	3355	3339	3714	10504	3729	3390	3493	10513	3496	3702	16800	3713	12806	4144	14008	4270	4428	3667	4136
Complete_BUSCOs_(C)	158	137	166	161	164	163	165	113	165	160	168	165	167	168	166	158	166	165	161	164	165	164	145	163	167	168	168	168	167	168	164	164	167	162	165	167	169	165	166	168	165	167	166	166	164	168	165	167	167
Complete_and_single-copy_BUSCOs_(S)	137	134	165	161	2	101	140	39	143	33	24	17	7	11	13	56	16	40	33	3	27	31	52	31	17	9	10	16	73	16	1	5	13	66	12	6	7	5	4	7	41	11	59	6	59	15	11	4	10
Complete_and_duplicated_BUSCOs_(D)	21	3	1	0	162	62	25	74	22	127	144	148	160	157	153	102	150	125	128	161	138	133	93	132	150	159	158	152	94	152	163	159	154	96	153	161	162	160	162	161	124	156	107	160	105	153	154	163	157
Fragmented_BUSCOs_(F)	58	72	56	46	54	59	44	85	40	63	58	55	55	60	53	63	52	60	57	58	60	54	72	51	57	58	59	55	61	55	55	60	51	58	51	58	53	57	54	56	62	56	53	43	52	60	60	58	61
Missing_BUSCOs_(M)	39	46	33	48	37	33	46	57	50	32	29	35	33	27	36	34	37	30	37	33	30	37	38	41	31	29	28	32	27	32	36	31	37	35	39	30	33	33	35	31	28	32	36	46	39	27	30	30	27
Total_BUSCO_groups_searched	255	255	255	255	255	255	255	255	255	255	255	255	255	255	255	255	255	255	255	255	255	255	255	255	255	255	255	255	255	255	255	255	255	255	255	255	255	255	255	255	255	255	255	255	255	255	255	255	255
reads	3494637	3494637	3494637	3494637	3494637	3494637	3494637	3494637	3494637	3494637	3494637	3494637	3494637	3494637	3494637	3494637	3494637	3494637	3494637	3494637	3494637	3494637	3494637	3494637	3494637	3494637	3494637	3494637	3494637	3494637	3494637	3494637	3494637	3494637	3494637	3494637	3494637	3494637	3494637	3494637	3494637	3494637	3494637	3494637	3494637	3494637	3494637	3494637	3494637
were_paired	3494637	3494637	3494637	3494637	3494637	3494637	3494637	3494637	3494637	3494637	3494637	3494637	3494637	3494637	3494637	3494637	3494637	3494637	3494637	3494637	3494637	3494637	3494637	3494637	3494637	3494637	3494637	3494637	3494637	3494637	3494637	3494637	3494637	3494637	3494637	3494637	3494637	3494637	3494637	3494637	3494637	3494637	3494637	3494637	3494637	3494637	3494637	3494637	3494637
aligned_concordantly_0_times	305303	410542	326971	446716	479521	482640	666544	676578	565271	247652	218191	266592	295645	240710	282961	318631	269664	253511	311410	371384	306334	380681	353908	327970	280267	300727	283256	284106	300384	274001	379746	327167	360259	378205	356846	370679	448637	401548	404993	443665	347795	370166	430615	479909	396008	201592	228370	286734	238357
aligned_concordantly_exactly_1_time	1748145	2222239	2908241	3046348	208450	1304971	1686997	509710	1605507	578419	520053	481437	396436	544516	598266	566120	559602	625855	631631	330030	442125	529884	623574	486322	586350	432164	550985	723118	744705	613162	346813	569932	689242	703494	573806	371528	312096	321769	266386	327214	509256	387736	577311	296988	494642	432661	460739	374186	432713
aligned_concordantly_>1_times	1441189	861856	259425	1573	2806666	1707026	1141096	2308349	1323859	2668566	2756393	2746608	2802556	2709411	2613410	2609886	2665371	2615271	2551596	2793223	2746178	2584072	2517155	2680345	2628020	2761746	2660396	2487413	2449548	2607474	2768078	2597538	2445136	2412938	2563985	2752430	2733904	2771320	2823258	2723758	2637586	2736735	2486711	2717740	2603987	2860384	2805528	2833717	2823567
pairs_aligned_concordantly_0_times	305303	410542	326971	446716	479521	482640	666544	676578	565271	247652	218191	266592	295645	240710	282961	318631	269664	253511	311410	371384	306334	380681	353908	327970	280267	300727	283256	284106	300384	274001	379746	327167	360259	378205	356846	370679	448637	401548	404993	443665	347795	370166	430615	479909	396008	201592	228370	286734	238357
aligned_discordantly_1_time	10957	8650	12858	15632	1611	6142	5480	8495	4131	6036	4712	5231	3578	6538	6101	4206	6104	5046	5751	2233	4091	3753	4814	3361	4799	3669	5376	5513	5049	5008	3083	5988	4970	5811	4642	3462	2297	2864	1729	2866	5588	3338	5078	1918	3770	3905	4707	3388	4885
pairs_aligned_0_times_concordantly_or_discordantly	294346	401892	314113	431084	477910	476498	661064	668083	561140	241616	213479	261361	292067	234172	276860	314425	263560	248465	305659	369151	302243	376928	349094	324609	275468	297058	277880	278593	295335	268993	376663	321179	355289	372394	352204	367217	446340	398684	403264	440799	342207	366828	425537	477991	392238	197687	223663	283346	233472
mates_make_up_the_pairs	588692	803784	628226	862168	955820	952996	1322128	1336166	1122280	483232	426958	522722	584134	468344	553720	628850	527120	496930	611318	738302	604486	753856	698188	649218	550936	594116	555760	557186	590670	537986	753326	642358	710578	744788	704408	734434	892680	797368	806528	881598	684414	733656	851074	955982	784476	395374	447326	566692	466944
aligned_0_times	390314	633689	486161	705458	795972	744886	1127924	749416	944339	309859	268890	337929	417378	304264	375721	355164	344562	360858	460471	600880	441984	600834	414323	496783	409792	460944	404070	417633	346170	401041	616418	482544	563120	443947	559611	567006	745210	542796	668627	669610	385909	543047	529213	776422	480303	245272	285175	409590	306615
aligned_exactly_1_time	142601	117229	128113	155579	35325	95137	102552	215487	82126	82520	68232	86421	70905	70640	90507	104498	95202	54531	67362	41219	52736	53235	107122	53756	57272	45236	57976	58108	100571	56113	42422	65618	62296	126673	61519	50018	41433	82741	34519	62174	108360	61787	122587	38701	104096	57955	69160	61719	62464
aligned_>1_times	55777	52866	13952	1131	124523	112973	91652	371263	95815	90853	89836	98372	95851	93440	87492	169188	87356	81541	83485	96203	109766	99787	176743	98679	83872	87936	93714	81445	143929	80832	94486	94196	85162	174168	83278	117410	106037	171831	103382	149814	190145	128822	199274	140859	200077	92147	92991	95383	97865
overall_alignment_rate	0.9442	0.9093	0.9304	0.8991	0.8861	0.8934	0.8386	0.8928	0.8649	0.9557	0.9615	0.9517	0.9403	0.9565	0.9462	0.9492	0.9507	0.9484	0.9341	0.914	0.9368	0.914	0.9407	0.9289	0.9414	0.934	0.9422	0.9402	0.9505	0.9426	0.9118	0.931	0.9194	0.9365	0.9199	0.9189	0.8934	0.9223	0.9043	0.9042	0.9448	0.9223	0.9243	0.8889	0.9313	0.9649	0.9592	0.9414	0.9561
Assembly	transabyss	trinity	rnaspades	megahit	idba_tran	shannon	binpacker	tadpole	translig	transabyss_trinity	transabyss_rnaspades	transabyss_megahit	transabyss_idba_tran	transabyss_shannon	transabyss_binpacker	transabyss_tadpole	transabyss_translig	trinity_rnaspades	trinity_megahit	trinity_idba_tran	trinity_shannon	trinity_binpacker	trinity_tadpole	trinity_translig	rnaspades_megahit	rnaspades_idba_tran	rnaspades_shannon	rnaspades_binpacker	rnaspades_tadpole	rnaspades_translig	megahit_idba_tran	megahit_shannon	megahit_binpacker	megahit_tadpole	megahit_translig	idba_tran_shannon	idba_tran_binpacker	idba_tran_tadpole	idba_tran_translig	shannon_binpacker	shannon_tadpole	shannon_translig	binpacker_tadpole	binpacker_translig	tadpole_translig	transabyss_trinity_rnaspades	transabyss_trinity_megahit	transabyss_trinity_idba_tran	transabyss_trinity_shannon
Busco_compared_to_Megahit	-0.03125	-0.25	0.277778	0	0.166667	0.111111	0.222222	-0.5	0.222222	-0.0104167	0.388889	0.222222	0.333333	0.388889	0.277778	-0.03125	0.277778	0.222222	0	0.166667	0.222222	0.166667	-0.166667	0.111111	0.333333	0.388889	0.388889	0.388889	0.333333	0.388889	0.166667	0.166667	0.333333	0.0555556	0.222222	0.333333	0.444444	0.222222	0.277778	0.388889	0.222222	0.333333	0.277778	0.277778	0.166667	0.388889	0.222222	0.333333	0.333333
Hisat2_compared_to_Megahit	0.342705	0.0775076	0.237842	0	-0.107438	-0.0471074	-0.5	-0.0520661	-0.282645	0.430091	0.474164	0.399696	0.31307	0.43617	0.357903	0.380699	0.392097	0.37462	0.265957	0.113222	0.286474	0.113222	0.316109	0.226444	0.321429	0.265198	0.327508	0.31231	0.390578	0.330547	0.0965046	0.242401	0.154255	0.284195	0.158055	0.150456	-0.0471074	0.176292	0.0395137	0.0387538	0.347264	0.176292	0.191489	-0.0842975	0.244681	0.5	0.456687	0.321429	0.433131
n50_compared_to_Megahit	0.15643	-0.26378	-0.145669	0	0.212092	0.0143954	0.40691	-0.5	0.5	-0.0183727	0.0345489	0.0892514	0.201536	0.0738964	0.278311	-0.271654	0.320537	-0.207349	-0.145669	0.145873	-0.0971129	0.103647	-0.429134	0.135317	-0.0761155	0.162188	-0.0419948	0.153551	-0.39895	0.185221	0.182342	0.00959693	0.222649	-0.372703	0.265835	0.167946	0.242802	0.0422265	0.255278	0.170825	-0.2979	0.194818	-0.178478	0.447217	-0.170604	-0.0577428	-0.0131234	0.147793	-0.00262467
n90_compared_to_Megahit	-0.118107	-0.172372	-0.143644	0	0.134731	-0.14524	0.185629	-0.228234	0.5	-0.14524	-0.130875	-0.0622456	0.0568862	-0.134067	-0.0478812	-0.212273	-0.0239406	-0.158008	-0.0941664	0.0299401	-0.156412	-0.0925704	-0.218658	-0.07661	-0.078206	0.0449102	-0.143644	-0.0702258	-0.213869	-0.0494773	0.110778	-0.0893783	0.0688623	-0.212273	0.167665	0.0239521	0.140719	-0.105339	0.170659	-0.0861862	-0.212273	-0.0734179	-0.209081	0.347305	-0.210677	-0.14524	-0.102147	-0.00638416	-0.14524
Average Assessment Score	0.110206	-0.130189	0.123654	0	0.0775467	-0.000472828	0.00616383	-0.305394	0.146526	0.112623	0.27163	0.211807	0.258538	0.264991	0.250298	0.0358285	0.272724	0.138055	0.0486799	0.122598	0.127311	0.0951423	-0.058151	0.122303	0.192534	0.252545	0.207859	0.24762	0.139167	0.262436	0.136577	0.123059	0.211115	0.0157539	0.199009	0.193246	0.196366	0.122319	0.176753	0.156654	0.1048	0.190108	0.0918292	0.196914	0.073569	0.262466	0.207091	0.241822	0.230844
Minuta	transabyss	trinity	rnaspades	megahit	idba_tran	shannon	binpacker	tadpole	translig	transabyss_trinity	transabyss_rnaspades	transabyss_megahit	transabyss_idba_tran	transabyss_shannon	transabyss_binpacker	transabyss_tadpole	transabyss_translig	trinity_rnaspades	trinity_megahit	trinity_idba_tran	trinity_shannon	trinity_binpacker	trinity_tadpole	trinity_translig	rnaspades_megahit	rnaspades_idba_tran	rnaspades_shannon	rnaspades_binpacker	rnaspades_tadpole	rnaspades_translig	megahit_idba_tran	megahit_shannon	megahit_binpacker	megahit_tadpole	megahit_translig	idba_tran_shannon	idba_tran_binpacker	idba_tran_tadpole	idba_tran_translig	shannon_binpacker	shannon_tadpole	shannon_translig	binpacker_tadpole	binpacker_translig	62.3855	transabyss_trinity_rnaspades	transabyss_trinity_megahit	transabyss_trinity_idba_tran	transabyss_trinity_shannon
mean_orf_percent	58.0704	57.7512	57.2251	56.1876	56.0937	53.0023	51.4595	67.4958	50.116	57.922	57.6724	57.2889	56.497	54.982	54.9225	64.2717	54.5324	57.4849	57.0481	56.3955	54.7004	54.5334	64.4648	54.0874	56.7648	56.3038	54.5361	54.3116	64.2471	53.8571	56.1082	53.9981	53.5322	64.4483	52.9678	55.2107	55.218	59.8588	55.0754	52.4343	61.0051	52.023	62.3493	50.8301	tadpole_translig	57.6972	57.4446	56.6858	55.6834
n90	302	271	287	389	413	291	469	232	574	286	294	341	388	295	349	242	367	279	322	380	283	323	238	335	330	385	289	334	241	349	408	325	417	242	457	377	419	305	428	327	243	337	244	522	243	287	314	366	288
n70	638	477	527	678	734	592	890	355	1039	557	585	655	716	612	748	412	794	501	560	681	543	655	381	694	594	696	566	695	387	740	726	622	788	407	848	696	760	557	778	696	418	728	437	957	444	547	589	674	571
n50	1255	865	1004	1162	1240	1109	1527	691	1708	1066	1136	1214	1242	1165	1383	856	1458	930	998	1173	1018	1178	740	1243	1078	1200	1070	1261	773	1331	1229	1128	1355	804	1438	1205	1288	1056	1311	1255	855	1303	913	1612	939	1047	1094	1186	1085
n30	2377	1569	1797	1897	1961	1892	2373	2189	2585	1963	2071	2129	2026	2053	2375	2317	2483	1685	1728	1900	1777	1992	1825	2076	1843	1935	1857	2091	1941	2175	1953	1894	2145	2008	2254	1943	2034	1986	2063	2070	1962	2130	2324	2469	2459	1905	1941	1962	1929
n10	9367	3063	3354	3337	3431	3454	4302	6418	4525	5857	6171	9062	3909	4771	6757	9367	7888	3211	3192	3365	3310	3751	9848	3867	3347	3412	3412	3855	9932	3994	3412	3411	3923	10191	4043	3433	3573	10149	3617	3785	11090	3876	14091	4389	23920	4465	4574	3780	4175
Complete_BUSCOs_(C)	170	151	187	180	189	184	184	133	175	175	189	181	189	185	185	170	179	188	180	189	184	184	159	175	188	191	191	190	188	189	189	186	186	179	183	191	192	188	189	188	183	185	183	186	174	189	181	189	185
Complete_and_single-copy_BUSCOs_(S)	140	143	186	180	0	115	166	40	157	40	26	20	0	17	22	46	18	52	45	0	32	44	46	38	13	2	11	11	74	19	0	8	13	63	14	1	3	0	0	6	38	11	64	13	53	18	10	0	12
Complete_and_duplicated_BUSCOs_(D)	30	8	1	0	189	69	18	93	18	135	163	161	189	168	163	124	161	136	135	189	152	140	113	137	175	189	180	179	114	170	189	178	173	116	169	190	189	188	189	182	145	174	119	173	121	171	171	189	173
Fragmented_BUSCOs_(F)	48	68	46	44	39	48	42	74	40	52	47	47	42	47	45	51	48	47	49	43	49	44	62	50	46	43	46	45	46	46	40	48	43	49	45	42	38	42	40	44	50	49	45	41	50	46	50	43	47
Missing_BUSCOs_(M)	37	36	22	31	27	23	29	48	40	28	19	27	24	23	25	34	28	20	26	23	22	27	34	30	21	21	18	20	21	20	26	21	26	27	27	22	25	25	26	23	22	21	27	28	31	20	24	23	23
Total_BUSCO_groups_searched	255	255	255	255	255	255	255	255	255	255	255	255	255	255	255	255	255	255	255	255	255	255	255	255	255	255	255	255	255	255	255	255	255	255	255	255	255	255	255	255	255	255	255	255	255	255	255	255	255
reads	4437325	4437325	4437325	4437325	4437325	4437325	4437325	4437325	4437325	4437325	4437325	4437325	4437325	4437325	4437325	4437325	4437325	4437325	4437325	4437325	4437325	4437325	4437325	4437325	4437325	4437325	4437325	4437325	4437325	4437325	4437325	4437325	4437325	4437325	4437325	4437325	4437325	4437325	4437325	4437325	4437325	4437325	4437325	4437325	4437325	4437325	4437325	4437325	4437325
were_paired	4437325	4437325	4437325	4437325	4437325	4437325	4437325	4437325	4437325	4437325	4437325	4437325	4437325	4437325	4437325	4437325	4437325	4437325	4437325	4437325	4437325	4437325	4437325	4437325	4437325	4437325	4437325	4437325	4437325	4437325	4437325	4437325	4437325	4437325	4437325	4437325	4437325	4437325	4437325	4437325	4437325	4437325	4437325	4437325	4437325	4437325	4437325	4437325	4437325
aligned_concordantly_0_times	361357	464979	347249	476004	1302629	722975	687672	805905	582264	289596	248799	300646	343565	294704	349575	378002	319513	275804	335493	400150	362492	408611	416680	380317	294470	339054	300973	336074	330911	293512	432334	348565	410101	418582	389371	595832	505674	503578	461294	478830	395121	422185	494965	550967	445102	233061	263214	303809	281790
aligned_concordantly_exactly_1_time	2523242	3006517	3739849	3958456	309703	1508806	2651787	589292	2463401	573636	523995	519948	815251	720636	584260	640108	536108	633985	643393	904949	672389	522659	698095	499347	588043	1039621	787113	704116	837519	631413	1101790	797364	656855	824736	567170	470730	752406	362605	676259	576950	575689	447606	656419	332840	619024	421402	454861	407684	425913
aligned_concordantly_>1_times	1552726	965829	350227	2865	2824993	2205544	1097866	3042128	1391660	3574093	3664531	3616731	3278509	3421985	3503490	3419215	3581704	3527536	3458439	3132226	3402444	3506055	3322550	3557661	3554812	3058650	3349239	3397135	3268895	3512400	2903201	3291396	3370369	3194007	3480784	3370763	3179245	3571142	3299772	3381545	3466515	3567534	3285941	3553518	3373199	3782862	3719250	3725832	3729622
pairs_aligned_concordantly_0_times	361357	464979	347249	476004	1302629	722975	687672	805905	582264	289596	248799	300646	343565	294704	349575	378002	319513	275804	335493	400150	362492	408611	416680	380317	294470	339054	300973	336074	330911	293512	432334	348565	410101	418582	389371	595832	505674	503578	461294	478830	395121	422185	494965	550967	445102	233061	263214	303809	281790
aligned_discordantly_1_time	15399	13549	15503	23995	6884	7594	7317	12297	5603	7835	5864	7274	5531	8117	8570	6106	8206	6333	7512	4620	5258	5474	6223	5186	6643	5232	7188	7403	6213	6258	11847	7618	8101	7223	6100	4750	4586	5788	3984	4576	7106	4718	7218	3157	5811	4880	5655	4318	5916
pairs_aligned_0_times_concordantly_or_discordantly	345958	451430	331746	452009	1295745	715381	680355	793608	576661	281761	242935	293372	338034	286587	341005	371896	311307	269471	327981	395530	357234	403137	410457	375131	287827	333822	293785	328671	324698	287254	420487	340947	402000	411359	383271	591082	501088	497790	457310	474254	388015	417467	487747	547810	439291	228181	257559	299491	275874
mates_make_up_the_pairs	691916	902860	663492	904018	2591490	1430762	1360710	1587216	1153322	563522	485870	586744	676068	573174	682010	743792	622614	538942	655962	791060	714468	806274	820914	750262	575654	667644	587570	657342	649396	574508	840974	681894	804000	822718	766542	1182164	1002176	995580	914620	948508	776030	834934	975494	1095620	878582	456362	515118	598982	551748
aligned_0_times	451505	686027	484680	718862	2347412	1202563	1157845	835531	953801	350319	292516	365299	467458	368227	460621	414150	398583	367326	463193	601539	503945	603429	471286	548797	401991	493984	410442	485541	374125	404992	660007	488224	622181	483202	584491	961990	808015	609066	721328	716624	448545	609012	616766	886723	538042	270097	314982	403666	353017
aligned_exactly_1_time	176397	148736	158664	182390	130923	108342	123854	319534	105826	98943	81097	103190	94500	89956	113254	141186	114062	67244	84458	70754	75805	73875	146702	73444	71093	73144	71563	76271	122106	69724	83312	86874	84444	158749	76502	89842	73708	159819	64419	77727	135834	76031	158206	59432	141532	70343	83650	74715	76928
aligned_>1_times	64014	68097	20148	2766	113155	119857	79011	432151	93695	114260	112257	118255	114110	114991	108135	188456	109969	104372	108311	118767	134718	128970	202926	128021	102570	100516	105565	95530	153165	99792	97655	106796	97375	180767	105549	130332	120453	226695	128873	154157	191651	149891	200522	149465	199008	115922	116486	120601	121803
overall_alignment_rate	0.9491	0.9227	0.9454	0.919	0.7355	0.8645	0.8695	0.9059	0.8925	0.9605	0.967	0.9588	0.9473	0.9585	0.9481	0.9533	0.9551	0.9586	0.9478	0.9322	0.9432	0.932	0.9469	0.9382	0.9547	0.9443	0.9538	0.9453	0.9578	0.9544	0.9256	0.945	0.9299	0.9456	0.9341	0.8916	0.909	0.9314	0.9187	0.9193	0.9495	0.9314	0.9305	0.9001	0.9394	0.9696	0.9645	0.9545	0.9602
Assembly	transabyss	trinity	rnaspades	megahit	idba_tran	shannon	binpacker	tadpole	translig	transabyss_trinity	transabyss_rnaspades	transabyss_megahit	transabyss_idba_tran	transabyss_shannon	transabyss_binpacker	transabyss_tadpole	transabyss_translig	trinity_rnaspades	trinity_megahit	trinity_idba_tran	trinity_shannon	trinity_binpacker	trinity_tadpole	trinity_translig	rnaspades_megahit	rnaspades_idba_tran	rnaspades_shannon	rnaspades_binpacker	rnaspades_tadpole	rnaspades_translig	megahit_idba_tran	megahit_shannon	megahit_binpacker	megahit_tadpole	megahit_translig	idba_tran_shannon	idba_tran_binpacker	idba_tran_tadpole	idba_tran_translig	shannon_binpacker	shannon_tadpole	shannon_translig	binpacker_tadpole	binpacker_translig	transabyss_trinity_rnaspades	transabyss_trinity_megahit	transabyss_trinity_idba_tran	transabyss_trinity_shannon	transabyss_trinity_binpacker
Busco_compared_to_Megahit	-0.106383	-0.308511	0.269231	0	0.346154	0.153846	0.153846	-0.5	-0.0531915	-0.0531915	0.346154	0.0384615	0.346154	0.192308	0.192308	-0.106383	-0.0106383	0.307692	0	0.346154	0.153846	0.153846	-0.223404	-0.0531915	0.307692	0.423077	0.423077	0.384615	0.307692	0.346154	0.346154	0.230769	0.230769	-0.0106383	0.115385	0.423077	0.461538	0.307692	0.346154	0.307692	0.115385	0.192308	0.115385	0.230769	-0.0638298	0.346154	0.0384615	0.346154	0.192308
Hisat2_compared_to_Megahit	0.297431	0.0365613	0.26087	0	-0.5	-0.148501	-0.134877	-0.0356948	-0.0722071	0.410079	0.474308	0.393281	0.279644	0.390316	0.287549	0.338933	0.356719	0.391304	0.284585	0.130435	0.23913	0.128458	0.275692	0.189723	0.352767	0.25	0.343874	0.259881	0.383399	0.349802	0.0652174	0.256917	0.107708	0.262846	0.149209	-0.0746594	-0.027248	0.12253	-0.000817439	0.00296443	0.301383	0.12253	0.113636	-0.0514986	0.201581	0.5	0.449605	0.350791	0.407115
n50_compared_to_Megahit	0.0851648	-0.315287	-0.167728	0	0.0714286	-0.0562633	0.334249	-0.5	0.5	-0.101911	-0.0276008	0.047619	0.0732601	0.00274725	0.202381	-0.324841	0.271062	-0.246285	-0.174098	0.0100733	-0.152866	0.014652	-0.447983	0.0741758	-0.089172	0.0347985	-0.0976645	0.0906593	-0.412951	0.154762	0.0613553	-0.0360934	0.17674	-0.380042	0.252747	0.0393773	0.115385	-0.112527	0.136447	0.0851648	-0.325902	0.129121	-0.264331	0.412088	-0.23673	-0.122081	-0.0721868	0.021978	-0.081741
n90_compared_to_Megahit	-0.27707	-0.375796	-0.324841	0	0.0648649	-0.312102	0.216216	-0.5	0.5	-0.328025	-0.302548	-0.152866	-0.00318471	-0.299363	-0.127389	-0.468153	-0.0700637	-0.350318	-0.213376	-0.0286624	-0.33758	-0.210191	-0.480892	-0.171975	-0.187898	-0.0127389	-0.318471	-0.175159	-0.471338	-0.127389	0.0513514	-0.203822	0.0756757	-0.468153	0.183784	-0.0382166	0.0810811	-0.267516	0.105405	-0.197452	-0.464968	-0.165605	-0.461783	0.359459	-0.464968	-0.324841	-0.238854	-0.0732484	-0.321656
Average Assessment Score	0.0316984	-0.20583	0.0946053	0	-0.0285665	-0.0596126	0.0980671	-0.345232	0.124867	0.0473065	0.218463	0.126373	0.220279	0.144772	0.172451	-0.054649	0.14886	0.133565	0.0302827	0.155765	0.0492512	0.0615117	-0.137383	0.0292108	0.173975	0.228036	0.186294	0.200749	0.0829824	0.236548	0.155908	0.122576	0.154895	-0.0572967	0.160953	0.116333	0.177508	0.0800669	0.155421	0.0848377	0.00711092	0.0988651	-0.0446788	0.188348	-0.0710327	0.207564	0.110849	0.22377	0.132575
Auratus	transabyss	trinity	rnaspades	megahit	idba_tran	shannon	binpacker	tadpole	translig	transabyss_trinity	transabyss_rnaspades	transabyss_megahit	transabyss_idba_tran	transabyss_shannon	transabyss_binpacker	transabyss_tadpole	transabyss_translig	trinity_rnaspades	trinity_megahit	trinity_idba_tran	trinity_shannon	trinity_binpacker	trinity_tadpole	trinity_translig	rnaspades_megahit	rnaspades_idba_tran	rnaspades_shannon	rnaspades_binpacker	rnaspades_tadpole	rnaspades_translig	megahit_idba_tran	megahit_shannon	megahit_binpacker	megahit_tadpole	megahit_translig	idba_tran_shannon	idba_tran_binpacker	idba_tran_tadpole	idba_tran_translig	shannon_binpacker	shannon_tadpole	shannon_translig	binpacker_tadpole	binpacker_translig	tadpole_translig	transabyss_trinity_rnaspades	transabyss_trinity_megahit	transabyss_trinity_idba_tran	transabyss_trinity_shannon
mean_orf_percent	54.0923	53.8594	44.2511	52.3626	53.537	47.672	46.9949	62.9524	43.205	54.0008	49.6452	53.2943	53.6741	50.3523	50.9549	60.2435	49.2811	48.4773	53.0069	53.5934	49.6329	50.0818	60.9351	47.9975	48.384	51.5621	46.4014	45.5957	57.971	43.7386	53.2797	49.456	49.7832	60.0522	47.9633	51.6969	52.1888	57.5537	51.4087	47.4268	57.1365	46.0548	58.825	45.1005	57.8467	50.7489	53.4404	53.6996	51.0985
n90	288	372	550	301	420	399	691	264	845	309	403	301	386	335	369	270	390	500	322	412	388	495	276	530	385	458	489	587	285	621	383	340	364	278	376	415	446	312	454	470	285	494	282	760	284	388	304	384	345
n70	738	746	930	475	851	885	1489	404	1859	742	836	558	824	824	1040	451	1145	853	551	832	837	1096	445	1232	644	870	904	1169	503	1297	714	649	726	424	779	861	957	575	992	1082	499	1166	500	1662	510	812	602	812	806
n50	1692	1463	1775	780	1636	1755	2477	716	3066	1595	1731	1205	1648	1731	2047	896	2265	1629	1034	1607	1658	2006	823	2267	1205	1662	1762	2130	897	2385	1437	1333	1543	732	1753	1670	1799	1139	1875	2011	978	2176	991	2746	1036	1654	1277	1623	1669
n30	3247	2569	3205	1726	2775	2987	3872	1406	4708	2970	3225	2556	2876	3092	3561	1882	3964	2912	2138	2734	2858	3316	1643	3762	2465	2852	3066	3546	1802	3959	2577	2559	2885	1473	3291	2839	3006	2200	3154	3310	1986	3603	2024	4272	2196	3047	2561	2837	2977
n10	11163	5050	5952	4065	5145	5502	6562	6346	7776	6947	7113	6164	5727	6447	7564	9048	8376	5616	4491	5126	5378	6032	5406	6801	5104	5328	5674	6284	6021	6901	4944	5038	5563	4721	6295	5274	5509	5246	5862	5941	5613	6463	6528	7154	7547	6493	5797	5626	6124
Complete_BUSCOs_(C)	237	218	241	230	244	239	236	204	236	243	245	246	245	243	243	236	242	245	246	246	244	242	229	242	244	246	246	244	243	245	247	245	243	239	243	245	245	242	245	245	241	244	240	241	238	246	247	246	244
Complete_and_single-copy_BUSCOs_(S)	153	188	228	230	3	128	184	20	172	32	14	32	5	11	16	38	15	45	62	6	28	41	45	33	41	6	12	14	57	15	7	24	33	51	29	5	5	1	5	14	37	10	48	8	39	8	16	7	6
Complete_and_duplicated_BUSCOs_(D)	84	30	13	0	241	111	52	184	64	211	231	214	240	232	227	198	227	200	184	240	216	201	184	209	203	240	234	230	186	230	240	221	210	188	214	240	240	241	240	231	204	234	192	233	199	238	231	239	238
Fragmented_BUSCOs_(F)	12	28	8	16	9	10	11	41	11	10	6	7	8	9	8	15	9	6	6	7	8	9	22	9	6	6	6	6	9	6	6	7	7	13	7	7	7	11	7	7	11	8	12	10	14	6	6	7	8
Missing_BUSCOs_(M)	6	9	6	9	2	6	8	10	8	2	4	2	2	3	4	4	4	4	3	2	3	4	4	4	5	3	3	5	3	4	2	3	5	3	5	3	3	2	3	3	3	3	3	4	3	3	2	2	3
Total_BUSCO_groups_searched	255	255	255	255	255	255	255	255	255	255	255	255	255	255	255	255	255	255	255	255	255	255	255	255	255	255	255	255	255	255	255	255	255	255	255	255	255	255	255	255	255	255	255	255	255	255	255	255	255
reads	3134906	3134906	3134906	3134906	3134906	3134906	3134906	3134906	3134906	3134906	3134906	3134906	3134906	3134906	3134906	3134906	3134906	3134906	3134906	3134906	3134906	3134906	3134906	3134906	3134906	3134906	3134906	3134906	3134906	3134906	3134906	3134906	3134906	3134906	3134906	3134906	3134906	3134906	3134906	3134906	3134906	3134906	3134906	3134906	3134906	3134906	3134906	3134906	3134906
were_paired	3134906	3134906	3134906	3134906	3134906	3134906	3134906	3134906	3134906	3134906	3134906	3134906	3134906	3134906	3134906	3134906	3134906	3134906	3134906	3134906	3134906	3134906	3134906	3134906	3134906	3134906	3134906	3134906	3134906	3134906	3134906	3134906	3134906	3134906	3134906	3134906	3134906	3134906	3134906	3134906	3134906	3134906	3134906	3134906	3134906	3134906	3134906	3134906	3134906
aligned_concordantly_0_times	519346	614078	491191	646389	1369773	705460	1124818	1071817	726145	481153	407787	439444	529088	519821	649124	516423	513225	416327	470521	549765	590769	621495	573470	539596	429281	459951	497493	675848	464651	464541	577820	555667	937382	572283	534528	605056	926340	794393	635568	810779	648340	678603	894364	1081145	639663	396994	417430	497428	511298
aligned_concordantly_exactly_1_time	938025	1816113	1720873	2486860	276812	596591	959966	215906	940730	462980	522132	498465	363241	437594	465082	440628	426761	711714	680672	857824	392822	742488	588723	475751	719474	637613	483562	652734	655084	571835	1019609	469892	701414	747133	531411	320411	314230	235432	291653	323817	320891	311738	379235	265280	364757	468469	448295	372493	392376
aligned_concordantly_>1_times	1677535	704715	922842	1657	1488321	1832855	1050122	1847183	1468031	2190773	2204987	2196997	2242577	2177491	2020700	2177855	2194920	2006865	1983713	1727317	2151315	1770923	1972713	2119559	1986151	2037342	2153851	1806324	2015171	2098530	1537477	2109347	1496110	1815490	2068967	2209439	1894336	2105081	2207685	2000310	2165675	2144565	1861307	1788481	2130486	2269443	2269181	2264985	2231232
pairs_aligned_concordantly_0_times	519346	614078	491191	646389	1369773	705460	1124818	1071817	726145	481153	407787	439444	529088	519821	649124	516423	513225	416327	470521	549765	590769	621495	573470	539596	429281	459951	497493	675848	464651	464541	577820	555667	937382	572283	534528	605056	926340	794393	635568	810779	648340	678603	894364	1081145	639663	396994	417430	497428	511298
aligned_discordantly_1_time	12454	14416	7720	45304	6298	4564	8997	4246	4479	8101	5685	11804	5344	8498	8246	5228	7454	5962	15186	4736	5870	7326	4864	5548	10409	3620	4817	5253	4094	4326	20581	13766	18375	13479	15390	3826	5160	3705	3653	2816	4388	3011	4058	1917	3192	5107	10104	4476	7038
pairs_aligned_0_times_concordantly_or_discordantly	506892	599662	483471	601085	1363475	700896	1115821	1067571	721666	473052	402102	427640	523744	511323	640878	511195	505771	410365	455335	545029	584899	614169	568606	534048	418872	456331	492676	670595	460557	460215	557239	541901	919007	558804	519138	601230	921180	790688	631915	807963	643952	675592	890306	1079228	636471	391887	407326	492952	504260
mates_make_up_the_pairs	1013784	1199324	966942	1202170	2726950	1401792	2231642	2135142	1443332	946104	804204	855280	1047488	1022646	1281756	1022390	1011542	820730	910670	1090058	1169798	1228338	1137212	1068096	837744	912662	985352	1341190	921114	920430	1114478	1083802	1838014	1117608	1038276	1202460	1842360	1581376	1263830	1615926	1287904	1351184	1780612	2158456	1272942	783774	814652	985904	1008520
aligned_0_times	739078	959332	745713	852050	2340730	1122511	1916018	1409877	1197134	675602	563512	548895	748554	743448	1010111	708604	743077	602811	616182	809193	901491	977346	800350	818933	570252	668654	756790	1123454	654247	706310	761776	771723	1480251	714687	721002	911357	1472680	1070883	960980	1330754	931513	1081713	1303241	1843977	926321	540484	513876	695625	732438
aligned_exactly_1_time	184629	171685	167159	342274	167790	129535	161372	200287	113448	149506	127048	179695	120914	152737	153134	146592	143582	116820	189431	108703	127887	123199	146073	111889	154102	106003	115596	117138	133527	105941	212053	190071	237143	239985	199046	113091	133016	140730	102614	104865	149418	105879	158733	117027	127469	123538	169944	119460	143641
aligned_>1_times	90077	68307	54070	7846	218430	149746	154252	524978	132750	120996	113644	126690	178020	126461	118511	167194	124883	101099	105057	172162	140420	127793	190789	137274	113390	138005	112966	100598	133340	108179	140649	122008	120620	162936	118228	178012	236664	369763	200236	180307	206973	163592	318638	197452	219152	119752	130832	170819	132441
overall_alignment_rate	0.8821	0.847	0.8811	0.8641	0.6267	0.821	0.6944	0.7751	0.8091	0.8922	0.9101	0.9125	0.8806	0.8814	0.8389	0.887	0.8815	0.9039	0.9017	0.8709	0.8562	0.8441	0.8723	0.8694	0.909	0.8934	0.8793	0.8208	0.8957	0.8873	0.8785	0.8769	0.7639	0.886	0.885	0.8546	0.7651	0.8292	0.8467	0.7878	0.8514	0.8275	0.7921	0.7059	0.8523	0.9138	0.918	0.8891	0.8832
Assembly	transabyss	trinity	rnaspades	megahit	idba_tran	shannon	binpacker	tadpole	translig	transabyss_trinity	transabyss_rnaspades	transabyss_megahit	transabyss_idba_tran	transabyss_shannon	transabyss_binpacker	transabyss_tadpole	transabyss_translig	trinity_rnaspades	trinity_megahit	trinity_idba_tran	trinity_shannon	trinity_binpacker	trinity_tadpole	trinity_translig	rnaspades_megahit	rnaspades_idba_tran	rnaspades_shannon	rnaspades_binpacker	rnaspades_tadpole	rnaspades_translig	megahit_idba_tran	megahit_shannon	megahit_binpacker	megahit_tadpole	megahit_translig	idba_tran_shannon	idba_tran_binpacker	idba_tran_tadpole	idba_tran_translig	shannon_binpacker	shannon_tadpole	shannon_translig	binpacker_tadpole	binpacker_translig	tadpole_translig	transabyss_trinity_rnaspades	transabyss_trinity_megahit	transabyss_trinity_idba_tran	transabyss_trinity_shannon
Busco_compared_to_Megahit	0.205882	-0.230769	0.323529	0	0.411765	0.264706	0.176471	-0.5	0.176471	0.382353	0.441176	0.470588	0.441176	0.382353	0.382353	0.176471	0.352941	0.441176	0.470588	0.470588	0.411765	0.352941	-0.0192308	0.352941	0.411765	0.470588	0.470588	0.411765	0.382353	0.441176	0.5	0.441176	0.382353	0.264706	0.382353	0.441176	0.441176	0.352941	0.441176	0.441176	0.323529	0.411765	0.294118	0.323529	0.235294	0.470588	0.5	0.470588	0.411765
Hisat2_compared_to_Megahit	0.14827	-0.0360152	0.140033	0	-0.5	-0.0907751	-0.357414	-0.187447	-0.115838	0.231466	0.378913	0.398682	0.135914	0.142504	-0.053075	0.188633	0.143328	0.327842	0.30972	0.0560132	-0.0166386	-0.042123	0.0675453	0.0436573	0.369852	0.241351	0.125206	-0.0911963	0.260297	0.191104	0.118616	0.105437	-0.211036	0.180395	0.172158	-0.0200084	-0.208509	-0.0735046	-0.036647	-0.160699	-0.0267481	-0.0770851	-0.151643	-0.333193	-0.0248526	0.40939	0.443987	0.205931	0.157331
n50_compared_to_Megahit	0.199475	0.149388	0.217629	0	0.187227	0.213255	0.371172	-0.5	0.5	0.178259	0.208005	0.0929571	0.189851	0.208005	0.277122	0.0253718	0.324803	0.185696	0.0555556	0.180884	0.192038	0.268154	0.00940507	0.325241	0.0929571	0.192913	0.214786	0.295276	0.0255906	0.35105	0.143701	0.120954	0.166885	-0.375	0.212817	0.194663	0.222878	0.0785214	0.239501	0.269248	0.0433071	0.305337	0.0461505	0.430009	0.055993	0.191164	0.108705	0.184383	0.194444
n90_compared_to_Megahit	-0.175676	0.0652574	0.22886	0	0.109375	0.0900735	0.358456	-0.5	0.5	0.00735294	0.09375	0	0.078125	0.03125	0.0625	-0.418919	0.0818015	0.182904	0.0193015	0.102022	0.0799632	0.178309	-0.337838	0.210478	0.0772059	0.144301	0.172794	0.262868	-0.216216	0.294118	0.0753676	0.0358456	0.0579044	-0.310811	0.0689338	0.104779	0.133272	0.0101103	0.140625	0.155331	-0.216216	0.17739	-0.256757	0.421875	-0.22973	0.0799632	0.00275735	0.0762868	0.0404412
Average Assessment Score	0.122017	-0.053154	0.228936	0	0.0200218	0.108532	0.0612904	-0.395816	0.186877	0.235542	0.323656	0.30525	0.237026	0.214828	0.166363	0.0561099	0.23319	0.317773	0.272579	0.222685	0.177042	0.178017	-0.0386339	0.221486	0.288899	0.293516	0.263195	0.19988	0.182446	0.318288	0.242717	0.208338	0.0945705	0.0340653	0.231796	0.190296	0.136914	0.107917	0.198198	0.164255	0.0701089	0.192014	0.0123906	0.138759	0.0411911	0.338514	0.333239	0.268951	0.228846
AVG of all runs	0.11286	-0.178959	0.14899	0	0.0126073	-0.0191875	0.0158917	-0.369234	0.112235	0.117801	0.26941	0.209508	0.228023	0.17253	0.209178	0.0291686	0.226512	0.169203	0.0804176	0.125636	0.0447085	0.0846231	-0.111118	0.0989443	0.218435	0.262471	0.200733	0.243545	0.107715	0.291556	0.148549	0.111635	0.147187	-0.0256906	0.198495	0.144994	0.137381	0.0795981	0.151956	0.0942358	-0.00903102	0.1181	-0.00707064	0.158051	-0.00979367	0.264762	0.208341	0.211801	0.152541
Adj AAS (conform 0.5 to -0.5)	0.18	-0.24	0.23	0	0.02	-0.03	0.02	-0.5	0.17	0.18	0.42	0.33	0.36	0.27	0.33	0.05	0.35	0.26	0.13	0.2	0.07	0.13	-0.15	0.15	0.34	0.41	0.31	0.38	0.17	0.45	0.23	0.17	0.23	-0.03	0.31	0.23	0.21	0.12	0.24	0.15	-0.01	0.18	-0.01	0.25	-0.01	0.41	0.32	0.33	0.24
A	B	C	D	E	F	G	H	I	J	K	L	M	N	O	P	Q	R	S	T	U	V	W	X	Y	Z	AA	AB	AC	AD	AE	AF	AG	AH	AI	AJ	AK	AL	AM	AN	AO	AP	AQ	AR	AS	AT	AU	AV	AW	AX
Figure 2 Data			Tadpole	Trinity	Shannon Cpp	BinPacker	MEGAHIT	TransLig	IDBA-tran	transABySS	rnaSPAdes
		Single	-0.5	-0.24	-0.03	0.02	0	0.17	0.02	0.18	0.23
		Bi	0.01625	0.12125	0.17125	0.20875	0.21375	0.24	0.25	0.28625	0.3425
		Tri	0.17	0.237857	0.241071	0.274643	0.291786	0.2925	0.298214	0.327857	0.372143
Figure 3 Data		Assembly	rnaSPAdes	trans-ABySS	TransLig	IDBA-tran	BinPacker	Shannon	Trinity	MEGAHIT	Tadpole
		n90	317.75	309.875	624	433.75	499.5	312.625	285.5	363.875	239.5
		n50	1200.75	1410.88	2043.75	1465.38	1766.38	1323.75	1020.12	1152.62	708.375
		Complete BUSCOs	199.25	191.5	195.125	201.125	195.75	196.5	168.125	193.875	141.5
		Duplicated BUSCOs	10.375	51.5	44.125	199	44	79.125	19.25	4.5	102
		Fragmented BUSCOs	35.875	38.875	28.75	33.25	34	38.375	54	34.5	74.375
		Missing BUSCOs	19.875	24.625	31.125	20.625	25.25	20.125	32.875	26.625	39.125
		Overall Alignment Rate	0.927588	0.936837	0.869988	0.816213	0.84145	0.8875	0.8943	0.896675	0.88105
Figure 4 Data			trans-ABySS	Trinity	rnaSPAdes	MEGAHIT	IDBA-tran	Shannon	BinPacker	Tadpole
		TransLig	0.35	0.15	0.45	0.31	0.24	0.18	0.25	-0.01
		Tadpole	0.05	-0.15	0.17	-0.03	0.12	-0.01	-0.01
		BinPacker	0.33	0.13	0.38	0.23	0.21	0.15
		Shannon	0.27	0.07	0.31	0.17	0.23
		IDBA-tran	0.36	0.2	0.41	0.23
		MEGAHIT	0.33	0.13	0.34
		rnaSPAdes	0.42	0.26
		Trinity	0.18
Figure 5 Data			rnaSPAdes								trans-ABySS								TransLig
		T	0.41																0.32
		rS									0.41								0.5	0.41
		M	0.47	0.35							0.32	0.47							0.41	0.29	0.47
		IDBA	0.45	0.39	0.43						0.33	0.45	0.38						0.38	0.27	0.45	0.32
		Sc	0.39	0.29	0.35	0.35					0.24	0.39	0.33	0.32					0.31	0.19	0.38	0.27	0.27
		BP	0.46	0.37	0.41	0.39	0.35				0.3	0.46	0.39	0.37	0.31				0.38	0.24	0.45	0.32	0.24	0.22
		Tp	0.32	0.22	0.26	0.32	0.22	0.26			0.1	0.32	0.21	0.25	0.14	0.19			0.2	0.06	0.3	0.16	0.19	0.09	0.1
		TL	0.5	0.41	0.47	0.45	0.38	0.45	0.3		0.32	0.5	0.41	0.38	0.31	0.38	0.2
			tA	T	M	ID	Sc	BP	Tp		T	rS	M	ID	Sc	BP	Tp		tA	T	rS	M	ID	Sc	BP
			MEGAHIT								IDBA-tran								Shannon Cpp
		T	0.32								0.33								0.24
		rS	0.47	0.35							0.45	0.39							0.39	0.29
		M									0.38	0.28	0.43						0.33	0.18	0.35
		ID	0.38	0.28	0.43														0.32	0.21	0.35	0.27
		Sc	0.33	0.18	0.35	0.27					0.32	0.21	0.35	0.27
		BP	0.39	0.26	0.41	0.28	0.25				0.37	0.25	0.39	0.28	0.25				0.31	0.16	0.35	0.25	0.25
		Tp	0.21	0.07	0.26	0.2	0.1	0.14			0.25	0.18	0.32	0.2	0.13	0.2			0.14	0	0.22	0.1	0.13	0.09
		TL	0.41	0.29	0.47	0.32	0.27	0.32	0.16		0.38	0.27	0.45	0.32	0.27	0.24	0.19		0.31	0.19	0.38	0.27	0.27	0.22	0.09
			tA	T	rS	ID	Sc	BP	Tp		tA	T	rS	M	Sc	BP	Tp		tA	T	rS	M	ID	BP	Tp
			BinPacker								Trinity								Tadpole
		T	0.3																0.1								T	-----	Trinity
		rS	0.46	0.37							0.41								0.32	0.22							rS	-----	rnaSPAdes
		M	0.39	0.26	0.41						0.32	0.35							0.21	0.07	0.26						M	-----	MEGAHIT
		ID	0.37	0.25	0.39	0.28					0.33	0.39	0.28						0.25	0.18	0.32	0.2					ID	-----	IDBA-tran
		Sc	0.31	0.16	0.35	0.25	0.25				0.24	0.29	0.18	0.21					0.14	0	0.22	0.1	0.13				Sc	-----	Shannon Cpp
		BP									0.3	0.37	0.26	0.25	0.16				0.19	0.06	0.26	0.14	0.2	0.09			BP	-----	BinPacker
		Tp	0.19	0.06	0.26	0.14	0.2	0.09			0.1	0.22	0.07	0.18	0	0.06											Tp	-----	Tadpole
		TL	0.38	0.24	0.45	0.32	0.24	0.22	0.1		0.32	0.41	0.29	0.27	0.19	0.24	0.06		0.2	0.06	0.3	0.16	0.19	0.09	0.1		TL	-----	TransLig
			tA	T	rS	M	ID	Sc	Tp		tA	rS	M	ID	Sc	BP	Tp		tA	T	rS	M	ID	Sc	BP		tA	-----	trans-ABySS
Figure 6 Data		rnaSPAdes			transABYSS			TransLig			Megahit			IDBA-tran			BinPacker			Trinity			Shannon Cpp			Tadpole
		AAS	Freq 1	Freq 2	AAS	Freq 1	Freq 2	AAS	Freq 1	Freq 2	AAS	Freq 1	Freq 2	AAS	Freq 1	Freq 2	AAS	Freq 1	Freq 2	AAS	Freq 1	Freq 2	AAS	Freq 1	Freq 2	AAS	Freq 1	Freq 2
		0.22	121	121	0.1	111	111	0.06	101	101	0.07	91	91	0.13	81	81	0.06	71	71	0	61	61	0	51	51	0	41	41
		0.22	122	120	0.14	111	111	0.09	101	101	0.1	91	91	0.18	81	81	0.09	71	71	0.06	62	60	0.09	52	50	0.06	42	40
		0.26	122	120	0.19	111	111	0.1	101	101	0.14	91	91	0.19	81	81	0.1	71	71	0.07	61	61	0.1	51	51	0.07	41	41
		0.29	121	121	0.2	111	111	0.16	101	101	0.16	91	91	0.2	82	80	0.14	71	71	0.1	61	61	0.13	51	51	0.09	42	40
		0.3	121	121	0.21	111	111	0.19	102	100	0.18	91	91	0.21	81	81	0.16	71	71	0.16	61	61	0.14	51	51	0.1	43	39
		0.32	122	120	0.24	111	111	0.2	101	101	0.2	91	91	0.24	81	81	0.19	71	71	0.18	62	60	0.16	51	51	0.13	41	41
		0.35	124	118	0.25	111	111	0.22	101	101	0.21	91	91	0.25	83	79	0.2	71	71	0.19	61	61	0.18	51	51	0.14	42	40
		0.37	121	121	0.3	111	111	0.24	102	100	0.25	91	91	0.27	83	79	0.22	71	71	0.21	61	61	0.19	51	51	0.16	41	41
		0.38	121	121	0.31	112	110	0.27	103	99	0.26	92	90	0.28	82	80	0.24	72	70	0.22	61	61	0.21	51	51	0.18	41	41
		0.39	123	119	0.32	114	108	0.29	101	101	0.27	92	90	0.32	83	79	0.25	73	69	0.24	62	60	0.22	52	50	0.19	42	40
		0.41	123	119	0.33	112	110	0.3	101	101	0.28	92	90	0.33	81	81	0.26	72	70	0.25	61	61	0.24	51	51	0.2	43	39
		0.43	121	121	0.37	111	111	0.31	101	101	0.29	91	91	0.35	81	81	0.28	71	71	0.26	61	61	0.25	52	50	0.21	41	41
		0.45	123	119	0.38	113	109	0.32	103	99	0.32	93	89	0.37	81	81	0.3	71	71	0.27	61	61	0.27	53	49	0.22	42	40
		0.46	121	121	0.39	112	110	0.38	103	99	0.33	91	91	0.38	82	80	0.31	71	71	0.28	61	61	0.29	51	51	0.25	41	41
		0.47	122	120	0.41	112	110	0.41	102	100	0.35	92	90	0.39	82	80	0.32	71	71	0.29	62	60	0.31	52	50	0.26	42	40
		0.5	121	121	0.45	111	111	0.45	102	100	0.38	91	91	0.43	81	81	0.35	71	71	0.3	61	61	0.32	51	51	0.3	41	41
					0.46	111	111	0.47	101	101	0.39	91	91	0.45	82	80	0.37	72	70	0.32	62	60	0.33	51	51	0.32	42	40
					0.47	111	111	0.5	101	101	0.41	92	90	0.45	81	81	0.38	71	71	0.33	61	61	0.35	53	49	0.32	41	41
					0.5	111	111				0.43	91	91				0.39	72	70	0.35	61	61	0.38	51	51
											0.47	92	90				0.41	71	71	0.37	61	61	0.39	51	51
											0.47	91	91				0.45	71	71	0.39	61	61
																	0.46	71	71	0.41	62	60
																				0.41	61	61
Figure S2 Data		Run	1	2	3	4	5	6	7	8	9	10	11	12	13	14	15	16	17	18	19	20	21	22	23	24	25	26	27	28
		rnaSPAdes	0.22	0.22	0.26	0.26	0.29	0.3	0.32	0.32	0.35	0.35	0.35	0.35	0.37	0.38	0.39	0.39	0.39	0.41	0.41	0.41	0.43	0.45	0.45	0.45	0.46	0.47	0.47	0.5
		trans-ABySS	0.1	0.14	0.19	0.2	0.21	0.24	0.25	0.3	0.31	0.31	0.32	0.32	0.32	0.32	0.33	0.33	0.37	0.38	0.38	0.38	0.39	0.39	0.41	0.41	0.45	0.46	0.47	0.5
		TransLig	0.06	0.09	0.1	0.16	0.19	0.19	0.2	0.22	0.24	0.24	0.27	0.27	0.27	0.29	0.3	0.31	0.32	0.32	0.32	0.38	0.38	0.38	0.41	0.41	0.45	0.45	0.47	0.5
		MEGAHIT	0.07	0.1	0.14	0.16	0.18	0.2	0.21	0.25	0.26	0.26	0.27	0.27	0.28	0.28	0.29	0.32	0.32	0.32	0.33	0.35	0.35	0.38	0.39	0.41	0.41	0.43	0.47	0.47
		IDBA-tran	0.13	0.18	0.19	0.2	0.2	0.21	0.24	0.25	0.25	0.25	0.27	0.27	0.27	0.28	0.28	0.32	0.32	0.32	0.33	0.35	0.37	0.38	0.38	0.39	0.39	0.43	0.45	0.45
		BinPacker	0.06	0.09	0.1	0.14	0.16	0.19	0.2	0.22	0.24	0.24	0.25	0.25	0.25	0.26	0.26	0.28	0.3	0.31	0.32	0.35	0.37	0.37	0.38	0.39	0.39	0.41	0.45	0.46
		Trinity	0	0.06	0.06	0.07	0.1	0.16	0.18	0.18	0.19	0.21	0.22	0.24	0.24	0.25	0.26	0.27	0.28	0.29	0.29	0.3	0.32	0.32	0.33	0.35	0.37	0.39	0.41	0.41
		Shannon Cpp	0	0.09	0.09	0.1	0.13	0.14	0.16	0.18	0.19	0.21	0.22	0.22	0.24	0.25	0.25	0.27	0.27	0.27	0.29	0.31	0.31	0.32	0.33	0.35	0.35	0.35	0.38	0.39
		Tadpole	0	0.06	0.06	0.07	0.09	0.09	0.1	0.1	0.1	0.13	0.14	0.14	0.16	0.18	0.19	0.19	0.2	0.2	0.2	0.21	0.22	0.22	0.25	0.26	0.26	0.3	0.32	0.32
two tailed paired T-test/FDR Corrected Data
	Tadpole	Trinity	Shannon Cpp	BinPacker	MEGAHIT	TransLig	IDBA-tran	transABySS	rnaSPAdes
Single-bi	1e-05	0.00018	0.00027	0.00063	0.00019	0.01196	0.00028	0.00086	0.01759
Bi-Tri	2e-05	0.00104	0.00359	0.00178	0.00086	0.00122	0.00162	0.00857	0.07125
[truncated: 80 more columns]

## Sheet: RunTimes
	minuta	auratus	sirensis	adspersus	ruber	femoralis	catebeianus	imitator	average			Master Average	Assembler		FIG S1	kmers	Time (min)
Fasterq_Dump:	00:05:28	00:07:56	00:05:42	00:04:48	00:07:10	00:03:57	00:07:24	00:06:56	00:06:10.125000		Fasterq_Dump:				Tadpole	5	3
Trimmomatic:	00:01:28	00:02:02	00:01:44	00:01:50	00:01:55	00:01:14	00:01:43	00:02:15	00:01:46.375000		Trimmomatic:				Trinity	5	143
Rcorrector:	00:03:57	00:26:35	00:04:46	00:04:33	00:04:46	00:03:37	00:07:09	00:05:43	00:07:38.250000		Rcorrector:				Shannon Cpp	5	29
Megahit_21,39,59,79,99:	00:02:52	00:09:04	00:03:26	00:03:17	00:03:29	00:02:26	00:04:23	00:03:08	00:04:00.625000		Megahit_21,39,59,79,99:	00:04:00.625000	Megahit		BinPacker	1	73
Trans-ABySS_21:	00:20:44	00:31:14	00:19:37	00:21:13	00:18:05	00:13:57	00:27:21	00:29:37	00:22:43.500000		Trans-ABySS_21:				MEGAHIT	5	4
Trans-ABySS_39:	00:20:27	00:30:06	00:18:37	00:18:56	00:17:28	00:13:08	00:22:49	00:24:08	00:20:42.375000		Trans-ABySS_39:				TransLig	1	67
Trans-ABySS_59:	00:18:37	00:29:58	00:17:04	00:15:36	00:15:57	00:12:12	00:18:56	00:18:48	00:18:23.500000		Trans-ABySS_59:				IDBA-tran	1	17
Trans-ABySS_79:	00:15:29	00:30:15	00:13:42	00:11:51	00:13:34	00:10:11	00:11:59	00:14:32	00:15:11.625000		Trans-ABySS_79:				trans-ABySS	1	87
Trans-ABySS_99:	00:09:30	00:28:57	00:09:02	00:06:00	00:09:03	00:06:12	00:02:45	00:05:48	00:09:39.625000		Trans-ABySS_99:	1:26:40.625000	transABySS		rnaSPAdes	5	12
rnaSPAdes_21,39,59,79,99:	00:18:41	00:25:06	00:10:09	00:08:13	00:10:07	00:06:39	00:11:37	00:08:03	00:12:19.375000		rnaSPAdes_21,39,59,79,99:	00:12:19.375000	rnaSPAdes
Tadpole:	00:03:01	00:04:24	00:03:00	00:02:54	00:02:57	00:02:25	00:03:01	00:03:05	00:03:05.875000		Tadpole:	00:03:05.875000	Tadpole
Shannon_25:	00:25:27	00:44:33	00:28:00	00:27:17	00:24:19	00:20:12	00:37:20	00:27:22	00:29:18.750000		Shannon_25:	00:29:18.750000	Shannon Cpp
Trinity_25:	02:08:09	03:07:07	03:09:55	01:39:11	02:24:59	02:24:36	02:43:23	01:29:41	02:23:22.625000		Trinity_25:	02:23:22.625000	Trinity
IDBA-tran_21,39,57,75,93:	00:16:49	00:28:25	00:16:11	00:14:30	00:16:43	00:12:01	00:20:00	00:14:27	00:17:23.250000		IDBA-tran_21,39,57,75,93:	00:17:23.250000	IDBA-tran
TransLig_31:	00:51:49	02:23:05	01:00:25	00:49:25	00:45:16	00:41:21	01:29:32	00:58:40	01:07:26.625000		TransLig_31:	01:07:26.625000	TransLig
BinPacker_25:	00:48:50	02:30:48	01:03:34	00:56:08	00:47:50	00:43:17	01:41:28	01:10:26	01:12:47.625000		BinPacker_25:	01:12:47.625000	BinPacker
TransRate_Merge:	00:06:21	00:18:14	00:12:02	00:06:10	00:09:14	00:07:17	00:12:08	00:04:02	00:09:26		TransRate_Merge:
trim_tigs:	00:00:07	00:00:15	00:00:10	00:00:08	00:00:09	00:00:07	00:00:10	00:00:05	00:00:08.875000		trim_tigs:
BUSCO:	00:06:50	00:15:39	00:09:06	00:09:07	00:08:45	00:06:55	00:09:50	00:05:24	00:08:57		BUSCO:
TransRate_Read_Mapping:	00:03:04	00:09:37	00:05:00	00:03:34	00:04:16	00:03:28	00:05:24	00:15:44	00:06:15.875000		TransRate_Read_Mapping:
HISAT2:	00:21:51	00:52:34	00:29:55	00:35:52	00:28:06	00:22:22	00:36:45	00:27:18	00:31:50.375000		HISAT2:
CRB_Blast:	00:39:24	01:35:53	00:32:09	00:47:12	00:51:08	00:23:53	00:34:08	00:17:23	00:42:38.750000		CRB_Blast:
											Computer Specs:	12-Core/24-Thread 128Gb Memory
